# Supplementary material for: S100A8/A9 as a prognostic biomarker with causal effects for post-acute myocardial infarction heart failure
Source: PubMed Central journal article supplement (PMC10973499; doi:10.1038/s41467-024-46973-7), 2024-03-27
Supplement: 41467_2024_46973_MOESM1_ESM.pdf [file 41467_2024_46973_MOESM1_ESM.pdf]

1  
2  
3  
4  
5  
6  
7  
8

**Supplementary Information**

**S100A8/A9 as a Prognostic Biomarker with Causal Effects for Post-acute Myocardial Infarction Heart Failure**

Jie Ma, Yang Li, Ping Li, et, al.

## CONTENTS

|    |                             |    |
|----|-----------------------------|----|
| 1  |                             |    |
| 2  | Supplementary Table 1.....  | 03 |
| 3  | Supplementary Table 2.....  | 04 |
| 4  | Supplementary Table 3.....  | 05 |
| 5  | Supplementary Table 4.....  | 06 |
| 6  | Supplementary Table 5.....  | 08 |
| 7  | Supplementary Table 6.....  | 09 |
| 8  | Supplementary Table 7.....  | 13 |
| 9  | Supplementary Table 8.....  | 15 |
| 10 | Supplementary Table 9.....  | 16 |
| 11 | Supplementary Table 10..... | 17 |
| 12 | Supplementary Table 11..... | 18 |
| 13 | Supplementary Table 12..... | 19 |
| 14 | Supplementary Table 13..... | 20 |
| 15 | Supplementary Table 14..... | 23 |
| 16 | Supplementary Table 15..... | 26 |
| 17 | Supplementary Table 16..... | 27 |
| 18 | Supplementary Table 17..... | 28 |
| 19 | Supplementary Fig. 1.....   | 29 |
| 20 | Supplementary Fig. 2.....   | 30 |
| 21 | Supplementary Fig. 3.....   | 31 |
| 22 | Supplementary Fig. 4.....   | 32 |
| 23 | Supplementary Fig. 5.....   | 33 |
| 24 | Supplementary Fig. 6.....   | 34 |
| 25 | Supplementary Fig. 7.....   | 35 |
| 26 | Supplementary Fig. 8.....   | 36 |
| 27 | Supplementary Fig. 9.....   | 37 |
| 28 | Supplementary Fig. 10.....  | 38 |
| 29 | Supplementary Fig. 11.....  | 39 |
| 30 | Supplementary Fig. 12.....  | 40 |
| 31 | Supplementary Fig. 13.....  | 41 |
| 32 | Supplementary Fig. 14.....  | 42 |
| 33 | Supplementary Fig. 15.....  | 43 |
| 34 | Supplementary Fig. 16.....  | 44 |
| 35 |                             |    |

1 **Supplementary Table 1. Clinicopathological characteristics of patients with acute**  
 2 **myocardial infarction (AMI) (n = 20) and healthy controls (HCs) (n = 10) in the first**  
 3 **screening stage**

| Variable                  | HC<br>(n=10)        | AMI (n=20)             |                     | P-value |
|---------------------------|---------------------|------------------------|---------------------|---------|
|                           |                     | No-HF events<br>(n=10) | HF events<br>(n=10) |         |
| Age (years)               | 63.0 (54.8–71.5)    | 61.0 (54.8–70.8)       | 63.0 (54.8–71.5)    | 0.950   |
| Male sex                  | 6 (60.0)            | 6 (60.0)               | 6 (60.0)            | 1.000   |
| SBP (mm Hg)               | 118.5 (112.8–124.3) | 116.5 (108.0–125.3)    | 111.5 (101.0–120.5) | 0.168   |
| DBP (mm Hg)               | 78.0 (72.8–83.0)    | 77.0 (73.5–81.5)       | 71.5 (67.3–82.3)    | 0.388   |
| Current smoking           | 5 (50.0)            | 5 (50.0)               | 6(60.0)             | 1.000   |
| Max Killip classification |                     |                        |                     | /       |
| I                         | /                   | 10 (100.0)             | 0 (0.0)             |         |
| II                        | /                   | 0 (0.0)                | 0 (0.0)             |         |
| III                       | /                   | 0 (0.0)                | 7 (70.0)            |         |
| IV                        | /                   | 0 (0.0)                | 3 (30.0)            |         |
| Hypertension              | 3 (30.0)            | 6 (60.0)               | 5 (50.0)            | 0.260   |
| Hyperlipidaemia           | 3 (30.0)            | 6 (60.0)               | 8 (80.0)            | 0.056   |
| Diabetes mellitus         | 1 (10.0)            | 2 (20.0)               | 44 (40.0)           | 0.372   |
| Culprit lesion profiles   |                     |                        |                     | /       |
| LAD                       | /                   | 4 (40.0)               | 4 (40.0)            | 1.000   |
| LCX                       | /                   | 3 (30.0)               | 2 (20.0)            | 1.000   |
| RCA                       | /                   | 3 (30.0)               | 4 (40.0)            | 1.000   |
| PCI                       | /                   | 10 (100.0)             | 10 (100.0)          | /       |

5 AMI, acute myocardial infarction; DBP, diastolic blood pressure; HC, healthy controls; HF, heart failure;  
 6 LAD, left anterior descending artery; LCX, left circumflex artery; RCA, right coronary artery; SBP, systolic  
 7 blood pressure; PCI, percutaneous coronary intervention.

8 Data were presented as absolute numbers (percentages) or medians (interquartile ranges). Categorical  
 9 variables were analyzed using a two-sided  $\chi^2$  or Fisher's exact test. Continuous parametric data were  
 10 analyzed using a two-sided t-test. Continuous non-parametric data were analyzed using a two-sided the  
 11 Mann–Whitney U test.  $P < 0.05$  was considered as significant. Source data are provided in the Source Data  
 12 File.

13  
 14  
 15  
 16  
 17  
 18  
 19  
 20  
 21  
 22

1 **Supplementary Table 2. Occurrence of adverse events in the discovery cohort and**  
 2 **validation cohort during the follow-up period**

3

| cohort              | HF events    |    |                    |                                                |                 | Cardiac death                                    | Non-cardiac death                |
|---------------------|--------------|----|--------------------|------------------------------------------------|-----------------|--------------------------------------------------|----------------------------------|
|                     | In-hospital  |    |                    | Long-term                                      |                 | Insufficient evidence to determine death from HF | Neoplasms, traffic accident, etc |
|                     | new HF onset | CS | Death due to HF/CS | HF progression resulting in re-hospitalization | Death due to HF |                                                  |                                  |
| Discovery (n=1062)  | 66           | 35 | 17                 | 112                                            | 66              | 18                                               | 3                                |
| Validation (n=1043) | 70           | 30 | 10                 | 66                                             | 16              | 2                                                | 1                                |

4 CS, cardiogenic shock ; HF, heart failure

5

6

1 **Supplementary Table 3. Definitions of the heart failure (HF) events**

2

| Outcome     |                                                | Definition                                                                                                                                                                                                                                                                                                                                                                                                             |
|-------------|------------------------------------------------|------------------------------------------------------------------------------------------------------------------------------------------------------------------------------------------------------------------------------------------------------------------------------------------------------------------------------------------------------------------------------------------------------------------------|
| in-hospital | new HF onset                                   | The new onset of signs and symptoms of HF were clinical manifestations such as dyspnea, orthopnea, peripheral edema, jugular vein dilatation, a third heart sound (S3), and lung rale.                                                                                                                                                                                                                                 |
|             | worsening HF                                   | Killip class II progressed to III or IV, Killip class III progressed to IV                                                                                                                                                                                                                                                                                                                                             |
|             | cardiogenic shock                              | systolic blood pressure $\leq$ 90 mm Hg for > 30 min after exclusion of hypovolaemia, with clinical evidence of hypoperfusion, inotrope dependence, or mechanical left ventricular support to correct the issue.                                                                                                                                                                                                       |
|             | Death due to HF or cardiogenic shock           | Death due to HF or cardiogenic shock was defined as a death with clinical, radiologic, or postmortem evidence of HF, in the absence of in-hospital acute ischemic events.                                                                                                                                                                                                                                              |
| Long-term   | HF progression resulting in re-hospitalization | A hospital readmission for which HF was the primary reason, specifically defined as an event meeting all of the following criteria: (1) admission to the hospital for at least 24 hours; (2) objective evidence of new or worsening HF (e.g., orthopnea, jugular venous distension, pulmonary basilar crackles, etc.); and (3) intensification of HF therapy (e.g., initiation of intravenous diuretics or inotropes). |
|             | Death due to HF                                | Death due to HF was defined as death in the context of clinically worsening symptoms and/or signs of HF with no other apparent cause, death as a consequence of a surgical procedure to treat HF, or death after referral to hospice for HF.                                                                                                                                                                           |

3 HF, heart failure

4

1 **Supplementary Table 4. Comparison of baseline information between the discovery**  
2 **cohort and the validation cohort**  
3

| <b>Variables</b>                      | <b>Discovery cohort<br/>(n=1062)</b> | <b>Validation cohort<br/>(n=1043)</b> | <b>P-value</b>   |
|---------------------------------------|--------------------------------------|---------------------------------------|------------------|
| <b>Demographics</b>                   |                                      |                                       |                  |
| Age (years)                           | 59.0 (51.0-67.0)                     | 40.0 (36.0-42.0)                      | <b>1.74E-269</b> |
| Male sex                              | 851 (80.1)                           | 951 (91.2)                            | <b>5.23E-13</b>  |
| SBP (mm Hg)                           | 120.0 (109.0-135.0)                  | 125.0 (117.0-133.0)                   | <b>1.12E-05</b>  |
| DBP (mm Hg)                           | 73.0 (68.0-82.0)                     | 79.0 (70.0-84.0)                      | <b>7.57E-11</b>  |
| Current smoking                       | 652 (61.4)                           | 680 (65.2)                            | <b>0.070</b>     |
| STEMI                                 | 796 (75.0%)                          | 642 (61.6%)                           | <b>3.93E-11</b>  |
| Killip classification                 |                                      |                                       |                  |
| I                                     | 879 (82.8)                           | 971 (93.1)                            | <b>3.84E-13</b>  |
| II                                    | 163 (15.3)                           | 58 (5.6)                              | <b>2.40E-13</b>  |
| III                                   | 20 (1.9)                             | 14 (1.3)                              | 0.325            |
| <b>Medical history</b>                |                                      |                                       |                  |
| Hypertension                          | 621 (58.5)                           | 513 (49.2)                            | <b>1.90E-05</b>  |
| Hyperlipidemia                        | 695 (65.4)                           | 482 (46.2)                            | <b>6.41E-19</b>  |
| Diabetes mellitus                     | 355 (33.4)                           | 213 (20.4)                            | <b>1.80E-11</b>  |
| CAD                                   | 258 (24.3)                           | 209 (20.0)                            | <b>0.019</b>     |
| <b>Biochemical</b>                    |                                      |                                       |                  |
| Neutrophil counts ( $\times 10^9/L$ ) | 5.8 (4.6-7.9)                        | 6.3 (4.7-8.3)                         | <b>0.002</b>     |
| HDL cholesterol (mmol/L)              | 1.0 (0.9-1.2) <sup>†</sup>           | 0.9 (0.8-1.1)                         | <b>3.98E-19</b>  |
| LDL cholesterol (mmol/L)              | 2.8 (2.3-3.5) <sup>†</sup>           | 2.3 (1.7-3.0)                         | <b>6.96E-32</b>  |
| Fasting glucose (mmol/L)              | 6.7 (5.6-9.3)                        | 5.5 (5.0-6.6)                         | <b>5.30E-51</b>  |
| Creatinine ( $\mu\text{mol/L}$ )      | 73.3 (62.8-84.5)                     | 71.3 (63.8-79.5)                      | <b>0.004</b>     |
| <b>Biomarkers</b>                     |                                      |                                       |                  |
| cTnI (ng/mL)                          | 1.5 (0.2-9.6)                        | 1.2 (0.2-6.6)                         | 0.095            |
| BNP (pg/mL)                           | 107.7 (42.0-243.2)                   | 82.0 (28.0-189.4)                     | <b>8.80E-08</b>  |
| hs-CRP (mg/L)                         | 6.0 (2.1-19.1)                       | 4.7 (1.7-13.5)                        | <b>8.00E-05</b>  |
| S100A8/A9 (ng/ml)                     | 3640.8 (2345.7-5068.8)               | 3657.4 (1905.0-4877.0)                | 0.060            |
| <b>Overall lesion profiles</b>        |                                      |                                       |                  |
| Left main artery disease              | 32 (3.0)                             | 40 (3.8)                              | 0.300            |
| 2-vessel disease                      | 311 (29.3)                           | 192 (18.4)                            | <b>4.91E-09</b>  |
| 3-vessel disease                      | 137 (12.9)                           | 226 (21.7)                            | <b>1.01E-07</b>  |
| <b>Echocardiography</b>               |                                      |                                       |                  |
| Admission LVEF (%)                    | 54.0 (48.0-58.0)                     | 55.0 (50.0-60.0)                      | <b>6.80E-06</b>  |
| <b>Infarct size</b>                   |                                      |                                       |                  |
| CK-MB-based estimation<br>(ng*h/ml)   | 5022.3 (2014.6-7088.9)               | 4456.1 (2319.1-6275.4)                | <b>0.002</b>     |
| <b>Medication at discharge</b>        |                                      |                                       |                  |
| Aspirin                               | 1038 (97.7)                          | 1010 (96.8)                           | <b>3.20E-05</b>  |
| P2Y12 receptor Inhibitor              | 1062 (100.0)                         | 964 (92.4)                            | <b>1.19E-19</b>  |
| Statin                                | 1019 (96.0)                          | 990 (94.9)                            | <b>0.002</b>     |
| ACEI or ARB                           | 606 (57.1)                           | 449 (43.0)                            | <b>8.62E-12</b>  |
| Beta-blockers                         | 783 (73.7)                           | 729 (69.9)                            | <b>0.010</b>     |
| MRA                                   | 175 (16.5)                           | 70 (6.7)                              | <b>1.76E-11</b>  |

4 ACEI, angiotensin-converting enzyme inhibitor; ARB, angiotensin-receptor blocker; BNP, B-type  
5 natriuretic peptide; CAD, coronary artery disease; cTnI, cardiac troponin I; DBP, diastolic blood pressure;  
6 HDL, high-density lipoprotein; hs-CRP, high-sensitivity C-reactive protein; LDL, low-density lipoprotein;  
7 LVEF, left ventricular ejection fraction; MRA, mineralocorticoid receptor antagonist; P2Y12 receptor

1 Inhibitor included clopidogrel and ticagrelor; SBP, systolic blood pressure; STEMI, ST-segment myocardial  
2 infraction.

3 Data were presented as absolute numbers (percentages) or medians (interquartile ranges). Categorical  
4 variables were analyzed using a two-sided  $\chi^2$  or Fisher's exact test. Continuous parametric data were  
5 analyzed using a two-sided t-test. Continuous non-parametric data were analyzed using a two-sided the  
6 Mann–Whitney U test.  $P < 0.05$  was considered as significant. Source data are provided in the Source Data  
7 File. Bold indicated  $P < 0.05$ . †1–4% data missing.

8

9

1 **Supplementary Table 5. Characteristics of the HCs (n = 588)**

2

| Variable                 | HCs (n = 588)       |                     |
|--------------------------|---------------------|---------------------|
|                          | Female<br>(n = 139) | Male<br>(n = 449)   |
| Age (years)              | 49.0 (44.0–55.0)    | 48.0 (43.0–53.5)    |
| BMI                      | 23.7 (22.2–25.7)    | 25.3 (23.1–27.6)    |
| SBP (mm Hg)              | 122.0 (112.0–133.0) | 124.0 (115.0–133.0) |
| DBP (mm Hg)              | 79.0 (70.0–87.0)    | 83.0 (75.5–89.0)    |
| Current smoking          | 0 (0.0)             | 225 (50.1)          |
| HDL cholesterol (mmol/L) | 1.4 (1.2–1.7)       | 1.2 (1.1–1.4)       |
| LDL cholesterol (mmol/L) | 3.1 (2.7–3.7)       | 3.2 (2.8–3.7)       |
| Fasting glucose (mmol/L) | 5.3 (5.0–5.6)       | 5.3 (5.0–5.6)       |

3 BMI, Body Mass Index; DBP, diastolic blood pressure; HC, healthy controls; LDL, low-density  
 4 lipoprotein; SBP, systolic blood pressure. Current smokers refer to those who have smoked 100  
 5 cigarettes in their lifetime and had smoked cigarettes in the past 30 days.

6

7

8

9

10

11

12

13

14

15

16

17

18

19

20

21

22

23



1 **Supplementary Table 6. Common differential proteins across the three groups**

2

| Protein abbreviation | Full name of each protein                          | AMI vs. HC          |          | HF events vs. No-HF events |          |
|----------------------|----------------------------------------------------|---------------------|----------|----------------------------|----------|
|                      |                                                    | log <sub>2</sub> FC | P-value  | log <sub>2</sub> FC        | P-value  |
| S100A12              | S100 calcium-binding protein A12                   | 6.201               | 4.66E-07 | 3.698                      | 1.08E-05 |
| S100A8               | S100 calcium-binding protein A8                    | 4.702               | 1.33E-07 | 2.666                      | 1.08E-05 |
| S100 A8/A9           | S100 calcium-binding proteins A8/A9                | 3.249               | 6.66E-08 | 2.030                      | 1.08E-05 |
| SNCG                 | Synuclein gamma                                    | -2.184              | 3.29E-05 | -1.412                     | 2.17E-05 |
| S100A6               | S100 calcium-binding protein A6                    | 2.688               | 7.99E-07 | 1.546                      | 1.30E-04 |
| CCK                  | Cholecystokinin                                    | 1.017               | 4.46E-06 | 0.667                      | 1.30E-04 |
| SART3                | Spliceosome-associated factor 3                    | 1.284               | 5.79E-05 | 0.912                      | 2.06E-04 |
| BNP                  | Natriuretic peptides B                             | 1.518               | 4.38E-05 | 1.342                      | 3.25E-04 |
| Cadherin-13          | Cadherin-13                                        | 2.047               | 9.83E-05 | 1.647                      | 4.87E-04 |
| pro-MMP13            | Pro-Matrix metalloproteinase-13                    | 1.992               | 5.79E-05 | 1.179                      | 7.25E-04 |
| Visfatin             | Nicotinamide phosphoribosyltransferase             | 1.055               | 4.38E-05 | 0.708                      | 7.25E-04 |
| SEMA3A               | Semaphorin-3A                                      | 1.287               | 6.16E-04 | 1.046                      | 1.05E-03 |
| C5/C5a               | Complement C5                                      | 1.629               | 2.59E-04 | 0.915                      | 1.05E-03 |
| ApoA1                | Apolipoprotein A-I                                 | 0.826               | 4.04E-04 | 0.582                      | 1.05E-03 |
| ALBUMIN              | Albumin                                            | 0.587               | 6.16E-04 | 0.464                      | 1.05E-03 |
| Syndecan-3           | Syndecan-3                                         | 1.187               | 3.84E-03 | 1.191                      | 1.50E-03 |
| TRAIL/<br>TNFSF10    | Tumor necrosis factor ligand superfamily member 10 | 1.137               | 2.75E-03 | 0.926                      | 1.50E-03 |
| Caspase-3            | Caspase-3                                          | 1.361               | 2.44E-05 | 0.852                      | 1.50E-03 |
| Plasminogen          | Plasminogen                                        | 1.026               | 4.04E-04 | 0.763                      | 1.50E-03 |
| TCCR / WSX-1         | T-cell cytokine receptor                           | 1.083               | 2.00E-06 | 0.683                      | 1.50E-03 |
| PAK7                 | P21-activated kinase 7                             | 1.131               | 1.90E-02 | 1.249                      | 2.09E-03 |
| FoxO1                | Forkhead box protein O1                            | 0.910               | 4.38E-05 | 0.659                      | 2.09E-03 |
| Neuritin             | Neuritin                                           | 1.596               | 1.62E-04 | 0.292                      | 2.09E-03 |
| DCBLD2               | CUB and LCCL domain containing 2                   | 0.795               | 1.67E-02 | 0.829                      | 2.88E-03 |
| Insulysin / IDE      | Insulysin                                          | 1.238               | 9.25E-06 | 0.777                      | 2.88E-03 |
| PYK2                 | Proline-rich tyrosine kinase 2                     | 1.044               | 9.25E-06 | 0.769                      | 2.88E-03 |
| Kremen-2             | Kremen protein 2                                   | 1.000               | 5.79E-05 | 0.624                      | 2.88E-03 |
| LBP                  | Lipopolysaccharide-binding protein                 | 0.916               | 6.46E-06 | 0.567                      | 2.88E-03 |
| Vitamin D-BP         | Vitamin D-binding protein                          | 0.925               | 5.00E-04 | 0.663                      | 3.89E-03 |
| TLR2                 | Toll-like receptor 2                               | 1.412               | 4.46E-06 | 0.438                      | 3.89E-03 |
| HSP90                | Heat shock protein 90                              | -1.589              | 2.59E-04 | -0.761                     | 3.89E-03 |
| Troponin I           | Troponin I1                                        | 2.411               | 4.46E-06 | 2.346                      | 5.20E-03 |
| Lipocalin-2          | Lipocalin-2                                        | 1.512               | 4.46E-06 | 0.857                      | 5.20E-03 |
| IL-17RD              | Interleukin-17 receptor D                          | 0.720               | 2.05E-04 | 0.494                      | 5.20E-03 |
| Vitronectin          | Vitronectin                                        | -1.356              | 1.62E-03 | -1.161                     | 5.20E-03 |
| Serpin A9            | Serpin A9                                          | -0.901              | 1.67E-02 | -1.735                     | 5.20E-03 |
| IL-4 R               | Interleukin-4 receptor                             | 1.006               | 2.05E-04 | 0.672                      | 6.84E-03 |
| Angiostatin          | Angiostatin                                        | 0.564               | 9.83E-05 | 0.349                      | 6.84E-03 |
| 6CKine               | C-C motif chemokine 21                             | -0.448              | 2.75E-03 | -2.645                     | 6.84E-03 |
| CXCR2 / IL-8<br>RB   | C-X-C chemokine receptor type 2                    | 1.099               | 3.29E-05 | 0.702                      | 8.93E-03 |
| IL-23 R              | Interleukin-23 receptor                            | 1.092               | 7.57E-05 | 0.677                      | 8.93E-03 |
| IBSP                 | Integrin-binding sialoprotein                      | 0.935               | 1.26E-04 | 0.634                      | 8.93E-03 |

|                   |                                                                           |        |          |        |          |
|-------------------|---------------------------------------------------------------------------|--------|----------|--------|----------|
| Aldolase A        | Aldolase A                                                                | 0.790  | 1.62E-04 | 0.531  | 8.93E-03 |
| Progranulin       | Progranulin                                                               | 0.724  | 5.79E-05 | 0.432  | 8.93E-03 |
| Kallikrein 6      | Kallikrein-6                                                              | 0.554  | 1.35E-03 | 0.406  | 8.93E-03 |
| ADAMTS-18         | A disintegrin and metalloproteinase with thrombospondin type-1 modules 18 | -1.345 | 1.62E-04 | -0.855 | 8.93E-03 |
| BAF57             | BRG1-associated factor 57                                                 | -0.874 | 2.76E-02 | -1.473 | 8.93E-03 |
| Pappalysin-1      | Pappalysin-1                                                              | -1.698 | 2.32E-03 | -2.115 | 8.93E-03 |
| CK-MB             | Creatine kinase B-type                                                    | 2.190  | 3.29E-05 | 0.946  | 1.15E-02 |
| FABP1             | Fatty acid-binding protein                                                | 1.219  | 2.00E-06 | 0.831  | 1.15E-02 |
| TFF3              | Trefoil factor 3                                                          | 1.175  | 1.62E-04 | 0.751  | 1.15E-02 |
| TL1A              | / Tumor necrosis factor ligand superfamily member 15                      | 1.143  | 3.29E-05 | 0.735  | 1.15E-02 |
| TNFSF15           |                                                                           |        |          |        |          |
| FADD              | FAS-associated death domain protein                                       | 0.986  | 4.38E-05 | 0.634  | 1.15E-02 |
| Endocan           | Endocan                                                                   | 0.951  | 5.00E-04 | 0.613  | 1.15E-02 |
| EGF R / ErbB1     | Epidermal growth factor receptor                                          | 0.874  | 9.83E-05 | 0.497  | 1.15E-02 |
| CART              | Cocaine- and amphetamine-regulated transcript protein                     | -0.754 | 7.18E-03 | -0.335 | 1.15E-02 |
| DLL1              | Delta-like protein 1                                                      | -1.158 | 2.75E-03 | -0.608 | 1.15E-02 |
| LIF               | Leukemia inhibitory factor                                                | 1.053  | 2.76E-02 | 1.066  | 1.47E-02 |
| EMAP-II           | Endothelial monocyte activating polypeptide II                            | 1.454  | 4.38E-05 | 0.862  | 1.47E-02 |
| EDAR              | Ectodysplasin A receptor                                                  | 1.335  | 1.26E-04 | 0.830  | 1.47E-02 |
| PGRP-S            | Peptidoglycan recognition protein-S                                       | 1.127  | 2.59E-04 | 0.820  | 1.47E-02 |
| HSP20             | Heat shock protein 20                                                     | 1.590  | 4.38E-05 | 0.809  | 1.47E-02 |
| sFRP-1            | Secreted frizzled-related protein 1                                       | 1.048  | 5.79E-05 | 0.686  | 1.47E-02 |
| ICAM-3 (CD50)     | Intercellular adhesion molecule 3                                         | 1.023  | 1.26E-04 | 0.638  | 1.47E-02 |
| TMEFF2            | Transmembrane protein with EGF-like and two follistatin-like domains 2    | 0.839  | 1.94E-03 | 0.618  | 1.47E-02 |
| IL-20 R beta      | Interleukin-20 receptor subunit beta                                      | 0.820  | 5.79E-05 | 0.564  | 1.47E-02 |
| GASP-1            | / Kunitz and NTR domain-containing-related protein                        | 0.708  | 1.26E-04 | 0.403  | 1.47E-02 |
| WFIKKNRP          |                                                                           |        |          |        |          |
| ADAMTS-5          | A disintegrin and metalloproteinase with thrombospondin motifs 5          | -3.190 | 5.00E-04 | -1.694 | 1.47E-02 |
| B3GNT1            | UDP-GlcNAc:betaGal beta-1,3-N-acetylglucosaminyltransferase 2             | -1.335 | 1.62E-03 | -2.150 | 1.47E-02 |
| FX                | Coagulation factor X                                                      | 1.613  | 7.54E-04 | 1.132  | 1.85E-02 |
| TLR3              | Toll-like receptor 3                                                      | 1.311  | 1.12E-03 | 0.553  | 1.85E-02 |
| CRTH-2            | Chemoattractant receptor-homologous molecule expressed on Th2 cells       | 1.076  | 1.79E-05 | 0.537  | 1.85E-02 |
| NrCAM             | Neuronal cell adhesion molecule                                           | 0.865  | 7.54E-04 | 0.522  | 1.85E-02 |
| EGF               | Epidermal growth factor                                                   | 0.802  | 5.00E-04 | 0.504  | 1.85E-02 |
| NRG1 Isoform GGF2 | Neuregulin1 isoform GGF2                                                  | 1.473  | 3.29E-05 | 0.504  | 1.85E-02 |
| Aldolase C        | Aldolase C                                                                | 0.665  | 1.12E-03 | 0.484  | 1.85E-02 |
| ICAM-5            | Intercellular adhesion molecule 5                                         | 0.666  | 2.59E-04 | 0.418  | 1.85E-02 |
| VEGI/ TNFSF15     | Tumor necrosis factor ligand superfamily member 15                        | 1.719  | 8.32E-03 | 1.218  | 2.32E-02 |
| PDGF-C            |                                                                           |        |          |        |          |
| KLF4              | Kruppel-like factor 4                                                     | 0.833  | 1.26E-04 | 0.545  | 2.32E-02 |
| TLR1              | Toll-like receptor 1                                                      | 0.884  | 1.62E-04 | 0.534  | 2.32E-02 |
| Nesfatin-1        | Nesfatin-1                                                                | 0.691  | 2.32E-03 | 0.483  | 2.32E-02 |
| Beta Defensin 4   | Beta-defensin 4A                                                          | 0.672  | 9.20E-04 | 0.476  | 2.32E-02 |
| pro-Glucagon      | Pro-Glucagon                                                              | 0.751  | 4.04E-04 | 0.466  | 2.32E-02 |

|                     |                                                                                   |        |          |        |          |
|---------------------|-----------------------------------------------------------------------------------|--------|----------|--------|----------|
| Nidgen-1            | Nidogen-1                                                                         | 0.710  | 7.57E-05 | 0.446  | 2.32E-02 |
| ApoB100             | Apolipoprotein B-100                                                              | 1.028  | 4.51E-03 | 0.443  | 2.32E-02 |
| CXCR1 / IL-8 RA     | C-X-C chemokine receptor type 1                                                   | 0.787  | 3.24E-04 | 0.432  | 2.32E-02 |
| IL-34               | Interleukin-34                                                                    | 0.947  | 9.20E-04 | 0.359  | 2.32E-02 |
| IGF-II              | Insulin-like growth factor II                                                     | 0.541  | 3.84E-03 | 0.334  | 2.32E-02 |
| EphB1               | Ephrin type-B receptor 1                                                          | 0.462  | 1.90E-02 | 0.235  | 2.32E-02 |
| RIP1                | Receptor Interacting Protein 1                                                    | -1.387 | 5.00E-04 | -1.189 | 2.32E-02 |
| MTUS1               | Microtubule-associated tumor suppressor 1                                         | 1.373  | 1.67E-02 | 1.551  | 2.88E-02 |
| AMICA               | Adhesion molecule interacting with CXADR antigen 1                                | 1.114  | 2.75E-03 | 1.327  | 2.88E-02 |
| CRP                 | C-reactive protein                                                                | 1.396  | 7.57E-05 | 0.889  | 2.88E-02 |
| HVEM / TNFRSF14     | Tumor necrosis factor receptor superfamily member 14                              | 0.056  | 1.27E-02 | 0.807  | 2.88E-02 |
| LOX-1               | Lectin-like oxidized low-density lipoprotein receptor-1                           | 1.502  | 7.54E-04 | 0.730  | 2.88E-02 |
| FGFR1               | Fibroblast growth factor receptor 1                                               | 0.928  | 1.62E-04 | 0.571  | 2.88E-02 |
| Galectin-3BP        | Galectin-3-binding protein                                                        | 0.872  | 4.04E-04 | 0.567  | 2.88E-02 |
| LTK                 | Leukocyte tyrosine kinase                                                         | 0.426  | 3.84E-03 | 0.319  | 2.88E-02 |
| NCAM-1 / CD56       | Neural cell adhesion molecule 1                                                   | 0.555  | 1.35E-03 | 0.318  | 2.88E-02 |
| EphA7               | Ephrin type-A receptor 7                                                          | 0.509  | 9.62E-03 | 0.244  | 2.88E-02 |
| Fc RIIB/C           | Fc fragment of IgG receptor IIb                                                   | 0.304  | 4.90E-02 | -0.052 | 2.88E-02 |
| S-100b              | Protein S100-B                                                                    | -0.864 | 3.11E-02 | -0.491 | 2.88E-02 |
| Chemerin            | Chemerin                                                                          | 2.182  | 3.11E-02 | -0.781 | 2.88E-02 |
| AMPKa1              | Protein kinase AMP-activated catalytic subunit alpha 1                            | -0.964 | 2.32E-03 | -0.945 | 2.88E-02 |
| TRPC6               | Transient receptor potential channel 6                                            | -1.754 | 2.05E-04 | -3.745 | 2.88E-02 |
| cTnT                | Cardiac troponin T                                                                | 1.920  | 6.66E-08 | 1.137  | 3.55E-02 |
| PSP                 | Prostate secretory protein                                                        | 1.150  | 9.20E-04 | 0.864  | 3.55E-02 |
| ADAMTS-13           | a disintegrin and metalloproteinase with a thrombospondin type 1 motif, member 13 | 1.200  | 5.00E-04 | 0.831  | 3.55E-02 |
| Glypican 3          | Glypican-3                                                                        | 0.656  | 7.18E-03 | 0.523  | 3.55E-02 |
| MMP-16 / MT3-MMP    | Matrix metalloproteinase-16                                                       | 0.987  | 1.12E-03 | 0.476  | 3.55E-02 |
| CXCR6               | C-X-C chemokine receptor type 6                                                   | 0.647  | 1.12E-03 | 0.416  | 3.55E-02 |
| IRF6                | Interferon regulatory factor 6                                                    | 0.708  | 1.12E-03 | 0.403  | 3.55E-02 |
| Angiopoietin-like 1 | Angiopoietin-like 1                                                               | 0.514  | 2.05E-04 | 0.296  | 3.55E-02 |
| Attractin           | Attractin                                                                         | 0.452  | 5.00E-04 | 0.296  | 3.55E-02 |
| Midkine             | Midkine                                                                           | 1.184  | 1.27E-02 | 0.142  | 3.55E-02 |
| RET                 | Ret proto-oncogene                                                                | -1.357 | 3.26E-03 | -0.869 | 3.55E-02 |
| Insulin R           | Insulin receptor                                                                  | -1.190 | 9.20E-04 | -1.098 | 3.55E-02 |
| Activin A           | Activin A                                                                         | -0.779 | 4.04E-04 | -4.920 | 3.55E-02 |
| Cathepsin B         | Cathepsin B                                                                       | 1.979  | 6.16E-04 | 0.878  | 4.33E-02 |
| FOLR1               | Folate receptor alpha                                                             | 1.994  | 7.57E-05 | 0.851  | 4.33E-02 |
| VEGF R2(KDR)        | kinase insert domain receptor                                                     | 0.747  | 3.11E-02 | 0.738  | 4.33E-02 |
| Angiogenin          | Angiogenin                                                                        | 1.463  | 1.26E-04 | 0.672  | 4.33E-02 |
| MFRP                | Membrane frizzled-related protein                                                 | 0.751  | 4.04E-04 | 0.470  | 4.33E-02 |
| EphB6               | Ephrin type-B receptor 6                                                          | 0.824  | 6.16E-04 | 0.447  | 4.33E-02 |
| Thrombospondin-4    | Thrombospondin-4                                                                  | 0.969  | 6.16E-04 | 0.442  | 4.33E-02 |
| IL-27               | Interleukin-27 subunit alpha                                                      | 0.703  | 1.26E-04 | 0.438  | 4.33E-02 |

|               |                                              |        |          |        |          |
|---------------|----------------------------------------------|--------|----------|--------|----------|
| TRKB          | Tropomyosin-related kinase B                 | 0.725  | 4.51E-03 | 0.433  | 4.33E-02 |
| Kallikrein 14 | Kallikrein-14                                | 0.704  | 2.76E-02 | 0.241  | 4.33E-02 |
| Survivin      | Survivin                                     | 1.155  | 4.39E-02 | -0.073 | 4.33E-02 |
| Tarc          | Thymus and activation-regulated chemokine    | -1.152 | 3.84E-03 | -0.949 | 4.33E-02 |
| TAF4          | TATA-box binding protein associated factor 4 | -1.397 | 1.35E-03 | -1.037 | 4.33E-02 |
| Desmin        | Desmin                                       | -2.533 | 2.59E-04 | -1.843 | 4.33E-02 |
| B7-1 /CD80    | CD80 molecule                                | -1.026 | 1.26E-04 | -3.013 | 4.33E-02 |

1 AMI, acute myocardial infarction; HC, healthy controls; HF, heart failure. Differences between the  
2 two groups were analyzed using a two-sided Wilcoxon-test.  $P < 0.05$  was considered as significant.  
3 P-values were not corrected for multiple testing. Source data are provided in the Source Data File.

4  
5  
6  
7  
8  
9  
10  
11  
12  
13  
14  
15  
16  
17  
18  
19

1 **Supplementary Table 7. Univariable predictors of post-AMI HF events in the**  
 2 **discovery cohort**

| Variable                                | Discovery cohort (n = 1,062) |                 |
|-----------------------------------------|------------------------------|-----------------|
|                                         | Crude HR (95%CI)             | P-value         |
| <b>Demographic</b>                      |                              |                 |
| Age*                                    | 1.27 (1.12–1.43)             | <b>1.43E-04</b> |
| Male sex                                | 0.73 (0.56–0.96)             | <b>0.022</b>    |
| SBP*                                    | 0.77 (0.67–0.88)             | <b>8.60E-05</b> |
| DBP*                                    | 0.78 (0.69–0.89)             | <b>2.08E-04</b> |
| Current smoking                         | 1.10 (0.87–1.39)             | 0.429           |
| Killip classification >1                | 1.48 (1.13–1.95)             | <b>0.005</b>    |
| <b>Medical history</b>                  |                              |                 |
| Hypertension                            | 1.02 (0.81–1.29)             | 0.849           |
| Hyperlipidaemia                         | 1.14 (0.89–1.45)             | 0.304           |
| Diabetes mellitus                       | 1.10 (0.87–1.40)             | 0.415           |
| CAD                                     | 1.05 (0.82–1.35)             | 0.680           |
| <b>Routine biochemical at admission</b> |                              |                 |
| Neutrophil count*                       | 1.38 (1.22–1.56)             | <b>4.58E-07</b> |
| HDL cholesterol*                        | 1.02 (0.89–1.16)             | 0.831           |
| LDL cholesterol*                        | 0.99 (0.87–1.13)             | 0.911           |
| Fasting glucose*                        | 1.23 (1.07–1.41)             | <b>0.004</b>    |
| Creatinine*                             | 1.32 (1.11–1.57)             | <b>0.002</b>    |
| <b>Biomarkers at admission</b>          |                              |                 |
| cTnI*                                   | 1.39 (1.19–1.63)             | <b>2.70E-05</b> |
| BNP*                                    | 1.61 (1.38–1.87)             | <b>7.19E-10</b> |
| hs-CRP*                                 | 1.25 (1.10–1.43)             | <b>0.001</b>    |
| S100A8/A9*                              | 1.92 (1.69–2.19)             | <b>3.95E-23</b> |
| S100A12*                                | 1.09 (0.97–1.24)             | 0.157           |
| <b>Echocardiography</b>                 |                              |                 |
| Admission LVEF*                         | 0.62 (0.55–0.70)             | <b>1.76E-13</b> |
| <b>Infarct size</b>                     |                              |                 |
| CK-MB-based estimation (ng*h/ml) *      | 1.24 (1.10,1.40)             | <b>4.42E-04</b> |
| <b>Overall lesion profiles</b>          |                              |                 |
| Multi-vessel disease                    | 1.18 (0.94–1.48)             | 0.161           |
| Left main artery disease                | 2.18 (1.30–3.67)             | <b>0.003</b>    |
| <b>At discharge</b>                     |                              |                 |
| Aspirin                                 | 0.52 (0.17–1.63)             | 0.265           |
| Statin                                  | 0.96 (0.45–2.03)             | 0.914           |
| ACEI or ARB                             | 0.97 (0.77–1.23)             | 0.820           |
| Beta-blockers                           | 1.20 (0.91–1.60)             | 0.203           |
| MRA                                     | 0.88 (0.64–1.23)             | 0.455           |

1 \*Expressed as per one standard deviation increase.  
2 ACEI, angiotensin-converting enzyme inhibitor; ARB, angiotensin-receptor blocker; BNP, B-type  
3 natriuretic peptide; CAD, coronary artery disease; CI, confidence interval; cTnI, cardiac troponin I;  
4 DBP, diastolic blood pressure; HDL, high-density lipoprotein; HR, hazard ratio; hs-CRP, high-  
5 sensitivity C-reactive protein; LDL, low-density lipoprotein; LVEF, left ventricular ejection fraction;  
6 MRA, mineralocorticoid receptor antagonist; P2Y12 receptor Inhibitor included clopidogrel and  
7 ticagrelor; SBP, systolic blood pressure.  
8 Cox regression was used to evaluate the association of variables and HF events. All tests were two-  
9 sided and  $P < 0.05$  was considered as significant. Bold indicated  $P < 0.05$ .  
10

1 **Supplementary Table 8. C-statistics of clinical biomarkers and candidate**  
 2 **proteins for HF events in the discovery cohort**

3

| Biomarkers | C-statistic (95% CI) | <i>P</i> -value |
|------------|----------------------|-----------------|
| S100A8/A9  | 0.65 (0.62–0.68)     | 8.39E-20        |
| S100A12    | 0.53 (0.49–0.56)     | 0.108           |
| cTnI       | 0.56 (0.53–0.60)     | 2.41E-04        |
| CRP        | 0.57 (0.53–0.60)     | 1.67E-04        |
| BNP        | 0.61 (0.57–0.64)     | 3.61E-10        |

4 BNP, B-type natriuretic peptide; CRP, C-reactive protein; cTnI, cardiac troponin I. Harrell's  
 5 concordance C-statistic was used to compare the predictive accuracy of the candidate proteins and  
 6 clinical biomarkers. All tests were two-sided and  $P < 0.05$  was considered as significant. Source  
 7 data are provided in the Source Data File.

8

9

10

11

12

13

14

15

16

17

18

19

20

21

22

23

24

25

26

27

28

29

1 **Supplementary Table 9. Three-categories net reclassification index (NRI) of**  
 2 **S100A8/A9 and S100A12 for HF events on the existing models in the discovery**  
 3 **cohort**

4

| Reference model                     | S100A8/A9 |         |       | S100A12 |         |       |
|-------------------------------------|-----------|---------|-------|---------|---------|-------|
|                                     | < 0.1     | 0.1–0.3 | ≥ 0.3 | < 0.1   | 0.1–0.3 | ≥ 0.3 |
| Total population                    |           |         |       |         |         |       |
| < 0.1                               | 60        | 25      | 0     | 75      | 10      | 0     |
| 0.1–0.3                             | 139       | 330     | 125   | 5       | 576     | 13    |
| ≥ 0.3                               | 13        | 83      | 287   | 0       | 19      | 364   |
| HF events                           |           |         |       |         |         |       |
| < 0.1                               | 8         | 9       | 0     | 16      | 1       | 0     |
| 0.1–0.3                             | 8         | 53      | 44    | 0       | 104     | 1     |
| ≥ 0.3                               | 0         | 19      | 155   | 0       | 4       | 170   |
| Number of correct reclassifications |           | 26      |       |         | -2      |       |
| Non-HF events                       |           |         |       |         |         |       |
| < 0.1                               | 52        | 16      | 0     | 59      | 9       | 0     |
| 0.1–0.3                             | 131       | 277     | 81    | 5       | 472     | 12    |
| ≥ 0.3                               | 13        | 64      | 132   | 0       | 15      | 194   |
| Number of correct reclassifications |           | 111     |       |         | -1      |       |

5 The patients were divided into subgroups that did or did not reach the primary endpoint of HF events.

6 The number of patients in each risk category was shown.

7 HF, heart failure; NRI, net reclassification improvement.

8



1 **Supplementary Table 10. C-statistics of clinical biomarkers and candidate**  
2 **proteins for HF events in the validation cohort**

3

| <b>Biomarkers</b> | <b>C-statistic (95% CI)</b> | <b>P-value</b> |
|-------------------|-----------------------------|----------------|
| S100A8/A9         | 0.70(0.66–0.74)             | 4.75E-22       |
| cTnI              | 0.60 (0.55–0.64)            | 1.65E-05       |
| CRP               | 0.57 (0.53–0.61)            | 0.001          |
| BNP               | 0.67 (0.63–0.71)            | 7.75E-18       |

4 BNP, B-type natriuretic peptide; CRP, C-reactive protein; cTnI, cardiac troponin I. Harrell's  
5 concordance C-statistic was used to compare the predictive accuracy of the candidate proteins and  
6 clinical biomarkers. All tests were two-sided and  $P < 0.05$  was considered as significant.

7

1 **Supplementary Table 11. Three-categories NRI of S100A8/A9 for HF events on**  
 2 **the existing models in the validation cohort**

3

| Reference model                     | S100A8/A9 |         |       |
|-------------------------------------|-----------|---------|-------|
|                                     | < 0.1     | 0.1–0.3 | ≥ 0.3 |
| Total population                    |           |         |       |
| < 0.1                               | 410       | 68      | 0     |
| 0.1–0.3                             | 115       | 224     | 42    |
| ≥ 0.3                               | 3         | 26      | 155   |
| HF events                           |           |         |       |
| < 0.1                               | 17        | 12      | 0     |
| 0.1–0.3                             | 12        | 31      | 17    |
| ≥ 0.3                               | 0         | 7       | 96    |
| Number of correct reclassifications |           | 10      |       |
| Non-HF events                       |           |         |       |
| < 0.1                               | 393       | 56      | 0     |
| 0.1–0.3                             | 103       | 193     | 25    |
| ≥ 0.3                               | 3         | 19      | 59    |
| Number of correct reclassifications |           | 44      |       |

4 The patients were divided into subgroups that did or did not reach the primary endpoint of HF events.

5 The number of patients in each risk category was shown.

6 HF, heart failure; NRI, net reclassification improvement.

7

8

1 **Supplementary Table 12. Association of S100A8/A9 and HF risk before and after**  
 2 **January 1<sup>st</sup> 2020**

3

|                            | Before COVID-19  |                 | After COVID-19   |                 |
|----------------------------|------------------|-----------------|------------------|-----------------|
|                            | HR (95%CI)       | <i>P</i> -value | HR (95%CI)       | <i>P</i> -value |
| Discovery cohort (n=1062)  |                  |                 |                  |                 |
| S100A8/A9                  | 1.71 (1.41-2.07) | 5.43E-08        | 3.65 (2.54-5.24) | 2.67E-12        |
| Adjusted for model 1       | 1.79 (1.47-2.17) | 7.03E-09        | 3.86 (2.66-5.60) | 1.16E-12        |
| Adjusted for model 2       | 1.83 (1.50-2.24) | 3.76E-09        | 3.96 (2.70-5.81) | 1.96E-12        |
| Adjusted for model 3       | 1.76 (1.43-2.17) | 7.37E-08        | 4.22 (2.81-6.31) | 3.01E-12        |
| Validation cohort (n=1043) |                  |                 |                  |                 |
| S100A8/A9                  | 2.91 (2.07-4.09) | 8.78E-10        | 1.99 (1.28-3.11) | 0.002           |
| Adjusted for model 1       | 2.91 (2.06-4.10) | 1.05E-09        | 1.96 (1.25-3.08) | 0.003           |
| Adjusted for model 2       | 2.80 (1.97-3.96) | 6.85E-09        | 1.93 (1.23-3.03) | 0.004           |
| Adjusted for model 3       | 2.40 (1.68-3.42) | 1.00E-06        | 1.95 (1.22-3.12) | 0.005           |

4 Unadjusted and adjusted HRs from Cox proportional hazards regression analysis were shown for  
 5 discovery-cohort (n=1062) and validation--cohort (n = 1043) patients with HF. S100A8/A9 was  
 6 measured on admission. Model 1: adjusted for age and sex; model 2: adjusted for model 1+systolic  
 7 blood pressure, Killip classification at admission, fasting glucose, creatinine, left main artery disease;  
 8 model 3: adjusted for model 2+neutrophil count, cardiac troponin I, B-type natriuretic peptide, c-  
 9 reactive protein, left ventricular ejection fraction at admission and estimated infarct size (CK-MB  
 10 AUC<sub>0-72</sub>). All tests were two-sided and P < 0.05 was considered as significant. HR, hazard ratio.  
 11 Source data are provided in the Source Data File.

1 **Supplementary Table 13. Baseline characteristics of the study population grouped by the quartiles of S100A8/A9**

2

| Variables                               | Discovery cohort (n=1062) |                        |                       |                     |                 | Validation cohort (n=1043) |                        |                       |                     |                 |
|-----------------------------------------|---------------------------|------------------------|-----------------------|---------------------|-----------------|----------------------------|------------------------|-----------------------|---------------------|-----------------|
|                                         | ≤ 2346<br>(n = 265)       | 2346-3641<br>(n = 266) | 3641-5069<br>(n= 266) | >5069<br>(n = 265)  | P for<br>trend  | ≤ 1905<br>(n =261)         | 1905-3657<br>(n = 261) | 3657-4877<br>(n= 261) | >4877<br>(n = 260)  | P for<br>trend  |
| <b>Demographics</b>                     |                           |                        |                       |                     |                 |                            |                        |                       |                     |                 |
| Age (years)                             | 62.0 (54.0-69.0)          | 60.0 (50.0-68.0)       | 59.0 (52.0-67.3)      | 55.0 (48.0-64.0)    | <b>5.00E-06</b> | 39.0 (36.0-41.0)           | 39.0 (36.0-43.0)       | 40.0 (37.0-43.0)      | 40.0 (37.0-42.0)    | 0.196           |
| Male sex                                | 207 (78.1)                | 199 (74.8)             | 221 (83.1)            | 224 (84.5)          | <b>0.012</b>    | 238 (91.2)                 | 233 (89.3)             | 2843 (93.1)           | 237 (91.2)          | 0.365           |
| SBP (mm Hg)                             | 120.0 (107.0-132.0)       | 120.0 (110.0-135.0)    | 120.0 (110.0-137.0)   | 120.0 (107.0-135.0) | 0.556           | 127.0 (117.5-136.0)        | 125.0 (119.0-132.0)    | 116.0 (122.0-131.0)   | 123.0 (116.0-130.8) | <b>0.010</b>    |
| DBP (mm Hg)                             | 70.0 (65.0-80.0)          | 72.0 (70.0-80.0)       | 73.0 (67.8-84.0)      | 75.0 (69.0-83.0)    | <b>0.037</b>    | 79.0 (70.0-86.0)           | 80.0 (70.0-83.5)       | 78.0 (70.0-82.0)      | 79.0 (70.0-81.9)    | 0.430           |
| Current smoking                         | 149 (56.2)                | 163 (61.3)             | 162 (60.9)            | 178 (67.2)          | 0.015           | 184 (70.5)                 | 161 (61.7)             | 173 (66.3)            | 162 (62.3)          | 0.130           |
| Killip classification                   |                           |                        |                       |                     | 0.332           |                            |                        |                       |                     | <b>0.001</b>    |
| I                                       | 225 (84.9)                | 218 (82.0)             | 219 (82.3)            | 217 (81.9)          |                 | 249 (95.4)                 | 252 (96.6)             | 235 (90.0)            | 235 (90.4)          |                 |
| II                                      | 38 (14.3)                 | 40 (15.0)              | 43 (16.2)             | 42 (15.8)           |                 | 11 (4.2)                   | 8 (3.1)                | 20 (7.7)              | 19 (7.3)            |                 |
| III                                     | 2 (0.8)                   | 8 (3.0)                | 4 (1.5)               | 6 (2.3)             |                 | 1 (0.4)                    | 1 (0.4)                | 6 (2.3)               | 6 (2.3)             |                 |
| <b>Medical history</b>                  |                           |                        |                       |                     |                 |                            |                        |                       |                     |                 |
| Hypertension                            | 156 (58.9)                | 157 (59.0)             | 152 (57.1)            | 156 (58.9)          | 0.889           | 122 (46.7)                 | 131 (50.2)             | 124 (47.5)            | 136 (52.3)          | 0.312           |
| Hyperlipidemia                          | 167 (63.0)                | 164 (61.7)             | 170 (63.9)            | 194 (73.2)          | <b>0.012</b>    | 121 (46.4)                 | 119 (45.6)             | 122 (46.7)            | 120 (46.2)          | 0.969           |
| Diabetes mellitus                       | 96 (36.2)                 | 91 (34.2)              | 89 (33.5)             | 79 (29.8)           | 0.123           | 51 (19.5)                  | 53 (20.3)              | 54 (20.7)             | 55 (21.2)           | 0.640           |
| CAD                                     | 93 (30.2)                 | 84 (24.4)              | 77 (24.1)             | 65 (18.5)           | <b>0.006</b>    | 56 (21.5)                  | 58 (22.2)              | 52 (19.9)             | 43 (16.5)           | 0.125           |
| <b>Biochemical</b>                      |                           |                        |                       |                     |                 |                            |                        |                       |                     |                 |
| Neutrophil counts (×10 <sup>9</sup> /L) | 5.4 (4.1-7.1)             | 6.1 (4.4-8.3)          | 6.7 (5.1-8.6)         | 7.2 (5.3-9.3)       | <b>2.89E-16</b> | 5.2 (4.2-7.1)              | 5.7 (4.6-7.1)          | 5.9 (4.7-8.1)         | 6.8 (5.1-8.7)       | <b>4.90E-12</b> |
| HDL cholesterol (mmol/L)                | 1.0 (0.9-1.2)             | 1.0 (0.9-1.2)          | 1.1 (0.9-1.2)         | 1.0 (0.9-1.2)       | 0.773           | 0.9 (0.8-1.1)              | 1.0 (0.8-1.1)          | 0.9 (0.8-1.1)         | 0.9 (0.8-1.1)       | 0.299           |
| LDL cholesterol (mmol/L)                | 2.7 (2.3-3.4)             | 2.9 (2.3-3.4)          | 2.9 (2.2-3.5)         | 2.9 (2.2-3.4)       | 0.779           | 2.3 (1.8-3.2)              | 2.3 (1.8-3.0)          | 2.3 (1.7-2.9)         | 2.2 (1.8-3.0)       | 0.200           |
| Fasting glucose (mmol/L)                | 6.7 (5.6-9.3)             | 6.4 (5.5-9.0)          | 6.7 (5.6-9.1)         | 7.2 (5.6-9.7)       | 0.543           | 5.6 (5.1-6.9)              | 5.4 (5.0-6.6)          | 5.5 (5.0-6.3)         | 5.4 (5.0-6.7)       | 0.604           |

|                                 |                        |                        |                        |                        |                 |                        |                         |                        |                        |                 |
|---------------------------------|------------------------|------------------------|------------------------|------------------------|-----------------|------------------------|-------------------------|------------------------|------------------------|-----------------|
| Creatinine (μmol/L)             | 72.9 (63.2-85.4)       | 72.6 (61.9-84.2)       | 73.3 (62.4-83.3)       | 74.5 (62.8-85.3)       | 0.520           | 71.3 (63.0-78.6)       | 69.5 (64.6-78.8)        | 72.0 (63.8-80.0)       | 71.7 (64.8-81.5)       | 0.740           |
| <b>Biomarkers</b>               |                        |                        |                        |                        |                 |                        |                         |                        |                        |                 |
| cTnI (ng/mL)                    | 0.9 (0.1-5.4)          | 1.3 (0.1-9.5)          | 2.1 (0.2-14.3)         | 1.9 (0.2-11.5)         | <b>0.024</b>    | 1.2 (0.2-6.5)          | 1.2 (0.2-4.6)           | 1.2 (0.3-6.6)          | 0.8 (0.1-9.1)          | <b>0.001</b>    |
| BNP (pg/mL)                     | 101.0 (40.0-234.0)     | 100.0 (48.5-225.1)     | 110.0 (40.5-262.0)     | 127.0 (47.5-256.0)     | 0.581           | 78.6 (28.0-165.0)      | 83 (27.0-189.0)         | 75.0 (29.0-191.4)      | 96.6 (32.3-221.3)      | <b>0.003</b>    |
| hs-CRP (mg/L)                   | 5.0 (1.8-15.8)         | 5.4 (1.9-19.9)         | 5.8 (2.2-17.5)         | 8.0 (2.7-21.9)         | 0.083           | 4.9 (1.6-15.4)         | 4.1 (1.5-11.7)          | 4.3 (1.7-12.9)         | 5.7 (1.9-15.5)         | 0.187           |
| <b>Overall lesion profiles</b>  |                        |                        |                        |                        |                 |                        |                         |                        |                        |                 |
| Multi-vessel disease            |                        |                        |                        |                        | 0.243           |                        |                         |                        |                        | 0.145           |
| Left main artery disease        | 10 (3.8)               | 12 (4.5)               | 8 (3.0)                | 2 (0.8)                |                 | 6 (2.3)                | 14 (5.4)                | 14 (5.4)               | 6 (2.3)                |                 |
| 2-vessel disease                | 82 (30.9)              | 80 (30.1)              | 73 (27.4)              | 76 (28.7)              |                 | 60 (23.0)              | 47 (18.0)               | 38 (14.6)              | 47 (18.1)              |                 |
| 3-vessel disease                | 38 (14.3)              | 29 (10.9)              | 37 (13.9)              | 33 (12.5)              |                 | 59 (22.6)              | 62 (23.8)               | 48 (18.4)              | 57 (21.9)              |                 |
| <b>Echocardiography</b>         |                        |                        |                        |                        |                 |                        |                         |                        |                        |                 |
| Admission LVEF (%)              | 55.0 (50.0-60.0)       | 55.0 (49.0-58.0)       | 53.0 (47.0-58.0)       | 53.0 (47.0-58.0)       | <b>1.00E-06</b> | 56.0 (52.0-60.0)       | 55.0 (50.0-60.0)        | 55.0 (50.0-60.0)       | 55.0 (47.0-58.0)       | <b>2.20E-05</b> |
| <b>Infarct size</b>             |                        |                        |                        |                        |                 |                        |                         |                        |                        |                 |
| CK-MB-based estimation(ng*h/ml) | 4445.1 (1564.4-6407.6) | 4863.4 (1560.4-6921.1) | 5277.7 (2752.1-7444.9) | 5577.4 (2619.8-7845.5) | <b>7.31E-07</b> | 4253.4 (2073.6-6108.0) | 4566.5 (2432.1-60401.0) | 4357.6 (2380.1-6178.0) | 4534.6 (2522.7-7422.7) | <b>0.006</b>    |
| <b>Medication at discharge</b>  |                        |                        |                        |                        |                 |                        |                         |                        |                        |                 |
| Aspirin                         | 264 (99.6)             | 257 (96.6)             | 261 (98.1)             | 256 (96.6)             | 0.629           | 257 (98.5)             | 254 (97.3)              | 248 (95.0)             | 251 (96.5)             | 0.095           |
| P2Y12 receptor Inhibitor        | 265 (100.0)            | 261 (98.1)             | 262 (98.5)             | 257 (97.0)             | \               | 253 (96.9)             | 244 (93.5)              | 230 (88.1)             | 237 (91.2)             | <b>0.002</b>    |
| Statin                          | 261 (98.5)             | 250 (94.0)             | 256 (96.2)             | 252 (95.1)             | 0.899           | 253 (96.9)             | 248 (95.0)              | 245 (93.9)             | 244 (93.8)             | 0.087           |
| ACEI or ARB                     | 156 (58.9)             | 145 (54.5)             | 166 (62.4)             | 139 (52.5)             | 0.641           | 114 (43.7)             | 122 (46.7)              | 104 (39.8)             | 109 (41.9)             | 0.375           |
| Beta-blockers                   | 201 (75.8)             | 192 (72.2)             | 191 (71.8)             | 199 (75.1)             | 0.744           | 176 (67.4)             | 183 (70.1)              | 172 (65.9)             | 198 (76.2)             | 0.085           |
| MRA                             | 41 (15.4)              | 50 (18.9)              | 48 (18.0)              | 36 (13.6)              | 0.635           | 19 (5.7)               | 18 (9.7)                | 19 (6.3)               | 14 (6.4)               | 0.151           |

- 1 ACEI, angiotensin-converting enzyme inhibitor; ARB, angiotensin-receptor blocker; BNP, B-type natriuretic peptide; CAD, coronary artery disease; cTnI, cardiac
- 2 troponin I; DBP, diastolic blood pressure; HDL, high-density lipoprotein; hs-CRP, high-sensitivity C-reactive protein; LDL, low-density lipoprotein; LVEF, left
- 3 ventricular ejection fraction; MRA, mineralocorticoid receptor antagonist; P2Y12 receptor Inhibitor included clopidogrel and ticagrelor; SBP, systolic blood pressure.

- 1 Data were presented as absolute numbers (percentages) or medians (interquartile ranges). Test for trend based on quartiles of S100A8/A9 levels. All tests were two-
- 2 sided and  $P < 0.05$  was considered as significant. Source data are provided in the Source Data File. Bold indicated  $P < 0.05$ .

**Supplementary Table 14. 50 S100A9 cis- protein quantitative trait loci (pQTLs) and their association with S100A9 in the genome-wide association studies (GWAS) summary statistic**

| Chrom       | Pos (GRCh38)     | rsids                       | effectAllele     | otherAllele      | Beta           | SE            | P-value       | N            | ImpMAF         | MAF in Asian   |
|-------------|------------------|-----------------------------|------------------|------------------|----------------|---------------|---------------|--------------|----------------|----------------|
| chr1        | 153344712        | NA                          | C                | G                | 0.2869         | 0.1442        | 0.0466        | 35363        | 0.00111        | 0.00000        |
| chr1        | 153345524        | rs552917187                 | G                | A                | -0.1508        | 0.0463        | 0.0011        | 35363        | 0.00791        | 0.00000        |
| chr1        | 153347960        | rs779301061                 | G                | GGA              | -0.4162        | 0.2022        | 0.0396        | 35363        | 0.00036        | 0.00008        |
| chr1        | 153351365        | rs115697787                 | A                | G                | -0.0932        | 0.0448        | 0.0374        | 35362        | 0.00836        | 0.00000        |
| chr1        | 153353113        | rs745415623                 | T                | C                | 1.1565         | 0.4320        | 0.0074        | 35363        | 0.00013        | 0.00000        |
| chr1        | 153353210        | rs780661487                 | G                | C                | 0.1770         | 0.0903        | 0.0499        | 35363        | 0.00202        | 0.00000        |
| <b>chr1</b> | <b>153356544</b> | <b>rs59961408</b>           | <b>A</b>         | <b>G</b>         | <b>-0.0255</b> | <b>0.0123</b> | <b>0.0381</b> | <b>35361</b> | <b>0.12511</b> | <b>0.20400</b> |
| chr1        | 153356930        | rs769941685                 | A                | G                | -0.2531        | 0.1283        | 0.0485        | 35360        | 0.00120        | 0.00000        |
| <b>chr1</b> | <b>153357702</b> | <b>rs12119788</b>           | <b>A</b>         | <b>G</b>         | <b>0.0371</b>  | <b>0.0132</b> | <b>0.0048</b> | <b>35360</b> | <b>0.10879</b> | <b>0.08500</b> |
| chr1        | 153358301        | rs112531265                 | A                | G                | -0.0878        | 0.0386        | 0.0228        | 35360        | 0.01117        | 0.00000        |
| chr1        | 153358798        | rs747411606                 | A                | G                | -0.3138        | 0.1345        | 0.0196        | 35360        | 0.00081        | 0.00000        |
| <b>chr1</b> | <b>153359373</b> | <b>rs2916193</b>            | <b>A</b>         | <b>G</b>         | <b>-0.0477</b> | <b>0.0094</b> | <b>0.0000</b> | <b>35360</b> | <b>0.25783</b> | <b>0.34600</b> |
| chr1        | 153359680        | NA                          | CTT              | CTT              | 0.0327         | 0.0090        | 0.0003        | 35350        | 0.35677        | 0.00000        |
| chr1        | 153359680        | rs1234133033                | C                | CTT              | -0.1671        | 0.0845        | 0.0481        | 35350        | 0.00227        | 0.00000        |
| chr1        | 153359680        | rs1168990096,<br>rs34039196 | CT               | CTT              | -0.0471        | 0.0097        | 0.0000        | 35350        | 0.25293        | 0.00000        |
| chr1        | 153361148        | rs537228847                 | T                | C                | -0.2199        | 0.1002        | 0.0282        | 35360        | 0.00156        | 0.00000        |
| <b>chr1</b> | <b>153361324</b> | <b>rs2070864</b>            | <b>G</b>         | <b>A</b>         | <b>-0.0456</b> | <b>0.0092</b> | <b>0.0000</b> | <b>35360</b> | <b>0.27329</b> | <b>0.02000</b> |
| chr1        | 153361732        | rs952053618                 | A                | G                | -0.4306        | 0.2077        | 0.0382        | 35360        | 0.00033        | 0.00000        |
| <b>chr1</b> | <b>153362049</b> | <b>rs1560833</b>            | <b>A</b>         | <b>G</b>         | <b>-0.0466</b> | <b>0.0093</b> | <b>0.0000</b> | <b>35360</b> | <b>0.26674</b> | <b>0.42500</b> |
| <b>chr1</b> | <b>153362908</b> | <b>rs1560832</b>            | <b>A</b>         | <b>G</b>         | <b>-0.0466</b> | <b>0.0093</b> | <b>0.0000</b> | <b>35360</b> | <b>0.26668</b> | <b>0.39200</b> |
| <b>chr1</b> | <b>153363542</b> | <b>rs724781</b>             | <b>G</b>         | <b>C</b>         | <b>-0.0468</b> | <b>0.0093</b> | <b>0.0000</b> | <b>35360</b> | <b>0.26681</b> | <b>0.34800</b> |
| chr1        | 153364102        | NA                          | CAAAAAAA<br>AAAA | CAAAAAAA<br>AAAA | 0.0212         | 0.0107        | 0.0478        | 35355        | 0.18718        | 0.00000        |

|             |                  |                                           |                                            |                                            |                |               |               |              |                |                |
|-------------|------------------|-------------------------------------------|--------------------------------------------|--------------------------------------------|----------------|---------------|---------------|--------------|----------------|----------------|
| chr1        | 153364102        | rs1478401322,<br>rs767275639              | CAAAAAAAAA<br>A                            | CAAAAAAAAA<br>AAAA                         | -0.0527        | 0.0106        | 0.0000        | 35355        | 0.18232        | 0.00000        |
| chr1        | 153364102        | rs397863495,<br>rs398049600,<br>rs5777859 | CAAAAAAAAA<br>AAA                          | CAAAAAAAAA<br>AAAA                         | 0.0185         | 0.0084        | 0.0273        | 35355        | 0.46769        | 0.00000        |
| chr1        | 153364645        | rs74807144                                | G                                          | A                                          | -0.1155        | 0.0266        | 0.0000        | 35360        | 0.02353        | 0.00000        |
| <b>chr1</b> | <b>153365467</b> | <b>rs3014874</b>                          | <b>A</b>                                   | <b>G</b>                                   | <b>-0.0537</b> | <b>0.0094</b> | <b>0.0000</b> | <b>35360</b> | <b>0.25791</b> | <b>0.30200</b> |
| chr1        | 153365872        | rs191112671                               | A                                          | G                                          | -0.1639        | 0.0696        | 0.0185        | 35360        | 0.00372        | 0.00000        |
| <b>chr1</b> | <b>153366275</b> | <b>rs3014875</b>                          | <b>A</b>                                   | <b>G</b>                                   | <b>-0.0282</b> | <b>0.0086</b> | <b>0.0010</b> | <b>35360</b> | <b>0.34949</b> | <b>0.11700</b> |
| chr1        | 153366824        | rs540566308                               | C                                          | CAAG                                       | -0.1351        | 0.0552        | 0.0144        | 35361        | 0.00569        | 0.00000        |
| <b>chr1</b> | <b>153370099</b> | <b>rs58644524</b>                         | <b>T</b>                                   | <b>C</b>                                   | <b>0.0273</b>  | <b>0.0133</b> | <b>0.0397</b> | <b>35361</b> | <b>0.10771</b> | <b>0.09400</b> |
| <b>chr1</b> | <b>153370702</b> | <b>rs3014878</b>                          | <b>T</b>                                   | <b>C</b>                                   | <b>0.0275</b>  | <b>0.0133</b> | <b>0.0384</b> | <b>35361</b> | <b>0.10772</b> | <b>0.07900</b> |
| <b>chr1</b> | <b>153371241</b> | <b>rs35195593</b>                         | <b>G</b>                                   | <b>GC</b>                                  | <b>0.0276</b>  | <b>0.0133</b> | <b>0.0375</b> | <b>35361</b> | <b>0.10784</b> | <b>0.01000</b> |
| <b>chr1</b> | <b>153371405</b> | <b>rs3014879</b>                          | <b>G</b>                                   | <b>A</b>                                   | <b>0.0262</b>  | <b>0.0132</b> | <b>0.0473</b> | <b>35361</b> | <b>0.10922</b> | <b>0.09800</b> |
| <b>chr1</b> | <b>153371466</b> | <b>rs12033317</b>                         | <b>A</b>                                   | <b>G</b>                                   | <b>0.0276</b>  | <b>0.0133</b> | <b>0.0375</b> | <b>35361</b> | <b>0.10784</b> | <b>0.09600</b> |
| chr1        | 153371894        | NA                                        | CATGC                                      | CATGC                                      | -0.0277        | 0.0133        | 0.0372        | 35361        | 0.10763        | 0.00000        |
| chr1        | 153371894        | rs3014880                                 | CATGG                                      | CATGC                                      | 0.0277         | 0.0133        | 0.0372        | 35361        | 0.10763        |                |
| <b>chr1</b> | <b>153372160</b> | <b>rs3006475</b>                          | <b>C</b>                                   | <b>A</b>                                   | <b>0.0274</b>  | <b>0.0133</b> | <b>0.0388</b> | <b>35362</b> | <b>0.10780</b> | <b>0.08050</b> |
| <b>chr1</b> | <b>153372439</b> | <b>rs3014881</b>                          | <b>G</b>                                   | <b>A</b>                                   | <b>0.0260</b>  | <b>0.0132</b> | <b>0.0488</b> | <b>35362</b> | <b>0.10916</b> | <b>0.10500</b> |
| chr1        | 153373217        | NA                                        | ATATATATA                                  | ATATATAT<br>A                              | 0.1288         | 0.0424        | 0.0024        | 35362        | 0.00921        | 0.00000        |
| chr1        | 153373217        | rs542546103                               | ATATATA                                    | ATATATAT<br>A                              | -0.1544        | 0.0476        | 0.0012        | 35362        | 0.00747        | 0.00000        |
| <b>chr1</b> | <b>153373435</b> | <b>rs2916191</b>                          | <b>C</b>                                   | <b>T</b>                                   | <b>0.0260</b>  | <b>0.0132</b> | <b>0.0486</b> | <b>35362</b> | <b>0.10917</b> | <b>0.08200</b> |
| <b>chr1</b> | <b>153373787</b> | <b>rs4772</b>                             | <b>G</b>                                   | <b>A</b>                                   | <b>0.0260</b>  | <b>0.0132</b> | <b>0.0485</b> | <b>35362</b> | <b>0.10917</b> | <b>0.07100</b> |
| <b>chr1</b> | <b>153376634</b> | <b>rs3006476</b>                          | <b>A</b>                                   | <b>C</b>                                   | <b>0.0272</b>  | <b>0.0133</b> | <b>0.0409</b> | <b>35362</b> | <b>0.10751</b> | <b>0.02900</b> |
| chr1        | 153377394        | rs577781525                               | ATCCTGAGA<br>TGTT                          | ATCCTGAG<br>ATGT                           | 0.1063         | 0.0460        | 0.0208        | 35360        | 0.00877        | 0.00000        |
| chr1        | 153377731        | rs141832834                               | A                                          | AG                                         | 0.0271         | 0.0133        | 0.0419        | 35362        | 0.10740        | 0.01000        |
| <b>chr1</b> | <b>153379651</b> | <b>rs3014885</b>                          | <b>T</b>                                   | <b>C</b>                                   | <b>0.0272</b>  | <b>0.0133</b> | <b>0.0409</b> | <b>35362</b> | <b>0.10754</b> | <b>0.10500</b> |
| chr1        | 153379784        | NA                                        | ACACCTAGG<br>GTGGCGGCG<br>GCTCCTTGG<br>CAG | ACACCTAG<br>GGTGGCGG<br>CGGCTCCT<br>TGGCAG | -0.0259        | 0.0132        | 0.0498        | 35362        | 0.10892        | 0.00000        |



|      |           |                             |           |                                            |         |        |        |       |         |         |
|------|-----------|-----------------------------|-----------|--------------------------------------------|---------|--------|--------|-------|---------|---------|
| chr1 | 153379784 | rs374815343,<br>rs555202163 | A         | ACACCTAG<br>GGTGGCGG<br>CGGCTCCT<br>TGGCAG | 0.0259  | 0.0132 | 0.0498 | 35362 | 0.10892 | 0.00000 |
| chr1 | 153380435 | NA                          | CGTCTCGG  | CGTCTCGG                                   | -0.0279 | 0.0132 | 0.0346 | 35362 | 0.10976 | 0.00000 |
| chr1 | 153380435 | rs377316404                 | CGTCTCGGA | CGTCTCGG                                   | 0.0279  | 0.0132 | 0.0347 | 35362 | 0.10975 | 0.00000 |

The 20 SNPs with MAF > 0.01 in the East Asian population are in bold. All tests were two-sided and P < 0.05 was considered as significant.

1 **Supplementary Table 15. Seventeen pQTLs show associations with mRNA expression of**  
2 **S100A8 in the GTEx portal**

3

| SNP Id           | Variant Id                    | <i>P</i> -value | NES          | Tissue             |
|------------------|-------------------------------|-----------------|--------------|--------------------|
| rs2916193        | chr1_153359373_G_A_b38        | 0.00000032      | -0.062       | Whole Blood        |
| rs2070864        | chr1_153361324_A_G_b38        | 0.000015        | -0.049       | Whole Blood        |
| rs1560833        | chr1_153362049_G_A_b38        | 0.000000048     | -0.065       | Whole Blood        |
| rs1560832        | chr1_153362908_G_A_b38        | 0.00000043      | -0.057       | Whole Blood        |
| rs724781         | chr1_153363542_C_G_b38        | 0.000000029     | -0.066       | Whole Blood        |
| <b>rs3014874</b> | <b>chr1_153365467_G_A_b38</b> | <b>3.6E-09</b>  | <b>-0.07</b> | <b>Whole Blood</b> |
| rs58644524       | chr1_153370099_C_T_b38        | 0.000025        | 0.073        | Whole Blood        |
| rs3014878        | chr1_153370702_C_T_b38        | 0.000018        | 0.076        | Whole Blood        |
| rs35195593       | chr1_153371241_GC_G_b38       | 0.000031        | 0.073        | Whole Blood        |
| rs3014879        | chr1_153371405_A_G_b38        | 0.000031        | 0.073        | Whole Blood        |
| rs12033317       | chr1_153371466_G_A_b38        | 0.000064        | 0.071        | Whole Blood        |
| rs3006475        | chr1_153372160_A_C_b38        | 0.0000097       | 0.075        | Whole Blood        |
| rs3014881        | chr1_153372439_A_G_b38        | 0.000031        | 0.073        | Whole Blood        |
| rs2916191        | chr1_153373435_T_C_b38        | 0.000013        | 0.076        | Whole Blood        |
| rs4772           | chr1_153373787_A_G_b38        | 0.000013        | 0.076        | Whole Blood        |
| rs3006476        | chr1_153376634_C_A_b38        | 0.0000084       | 0.076        | Whole Blood        |
| rs3014885        | chr1_153379651_C_T_b38        | 0.000011        | 0.076        | Whole Blood        |

4 NES, normalized effect size; SNP, single nucleotide polymorphism. NES is computed as the effect of the  
5 alternative allele relative to the reference allele.

6 All tests were two-sided and  $P < 0.05$  was considered as significant. The SNP with the most significant P-  
7 value is in bold.

8

9

10

1 **Supplementary Table 16. Seventeen pQTLs show associations with mRNA expression of**  
2 **S100A9 in the GTEx portal**

3

| SNP Id           | Variant Id                    | P-value         | NES           | Tissue             |
|------------------|-------------------------------|-----------------|---------------|--------------------|
| rs2916193        | chr1_153359373_G_A_b38        | 5.00E-11        | -0.076        | Whole Blood        |
| rs2070864        | chr1_153361324_A_G_b38        | 0.0000038       | -0.049        | Whole Blood        |
| rs1560833        | chr1_153362049_G_A_b38        | 2.40E-10        | -0.071        | Whole Blood        |
| rs1560832        | chr1_153362908_G_A_b38        | 2.80E-09        | -0.063        | Whole Blood        |
| rs724781         | chr1_153363542_C_G_b38        | 4.60E-11        | -0.074        | Whole Blood        |
| <b>rs3014874</b> | <b>chr1_153365467_G_A_b38</b> | <b>2.80E-14</b> | <b>-0.085</b> | <b>Whole Blood</b> |
| rs58644524       | chr1_153370099_C_T_b38        | 2.60E-09        | 0.097         | Whole Blood        |
| rs3014878        | chr1_153370702_C_T_b38        | 6.30E-10        | 0.1           | Whole Blood        |
| rs35195593       | chr1_153371241_GC_G_b38       | 5.80E-10        | 0.1           | Whole Blood        |
| rs3014879        | chr1_153371405_A_G_b38        | 5.80E-10        | 0.1           | Whole Blood        |
| rs12033317       | chr1_153371466_G_A_b38        | 1.50E-09        | 0.1           | Whole Blood        |
| rs3006475        | chr1_153372160_A_C_b38        | 1.30E-10        | 0.1           | Whole Blood        |
| rs3014881        | chr1_153372439_A_G_b38        | 5.80E-10        | 0.1           | Whole Blood        |
| rs2916191        | chr1_153373435_T_C_b38        | 4.20E-11        | 0.11          | Whole Blood        |
| rs4772           | chr1_153373787_A_G_b38        | 4.20E-11        | 0.11          | Whole Blood        |
| rs3006476        | chr1_153376634_C_A_b38        | 2.80E-10        | 0.1           | Whole Blood        |
| rs3014885        | chr1_153379651_C_T_b38        | 1.50E-09        | 0.098         | Whole Blood        |

4 NES, normalized effect size; SNP, single nucleotide polymorphism. NES is computed as the effect of the  
5 alternative allele relative to the reference allele.

6 All tests were two-sided and  $P < 0.05$  was considered as significant. The SNP with the most significant P-  
7 value is in bold.

8

9

10

1 **Supplementary Table 17. Clinical characteristics in patients with AMI from UK**

2 **Biobank (UKB)**

3

| Variable     | UKB (n = 1144)         |                           | <i>P</i> -value |
|--------------|------------------------|---------------------------|-----------------|
|              | HF events<br>(n = 224) | No-HF events<br>(n = 920) |                 |
| Age (years)  | 56.0 (52.6–59.2)       | 55.7 (51.6–58.4)          | 0.062           |
| Male sex (%) | 157 (70.1)             | 649 (70.5)                | 0.894           |

4

5 Data were presented as absolute numbers (percentages) or medians (interquartile ranges). Categorical  
6 variables were analyzed using a two-sided  $\chi^2$  or Fisher's exact test. Continuous non-parametric data were  
7 analyzed using a two-sided the Mann–Whitney U test.  $P < 0.05$  was considered as significant. Source data  
8 are provided in the Source Data File.

9

1 **Supplementary Fig. 1 Enrollment flowchart in the discovery and validation cohorts**  
 2 **a** discovery cohort (n = 1062). **b** validation cohort (n = 1043). AMI, acute myocardial infarction; HF, heart  
 3 failure; PCI, percutaneous coronary intervention.

4

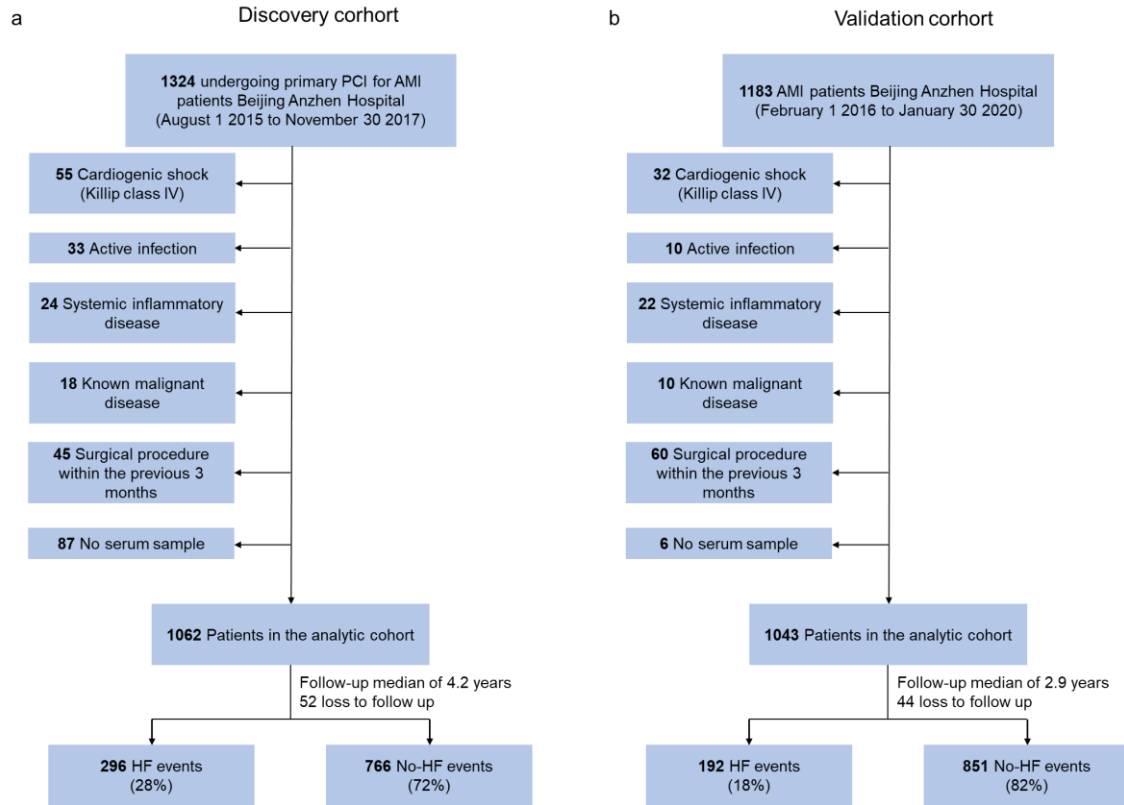

5

1 **Supplementary Fig. 2 Proteomic study flowchart**

2 AMI, acute myocardial infarction; DEPs, differentially expressed proteins; HC, healthy control, HF, heart  
3 failure.

4

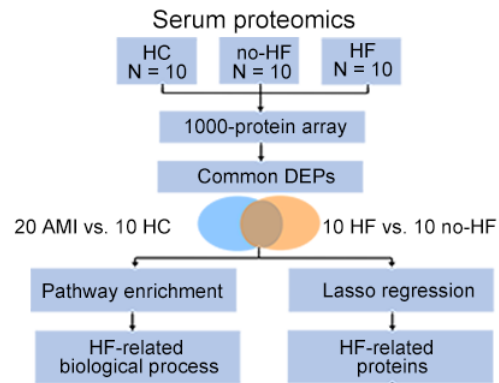

5

6

7

8

9

10

11

12

13

14

15

16

17

1 **Supplementary Fig. 3 HF-associated changes in serum proteomics**

2 **a** Heat map of 134 common differentially expressed proteins (DEPs) in healthy controls (HCs), patients with  
3 AMI without HF (no-HF), and patients with AMI with HF (HF). **b** The top ten enriched pathways detected  
4 using the Reactome Pathway Database indicating the biological significance of 134 common DEPs.  $P < 0.05$   
5 was considered as significant.  
6

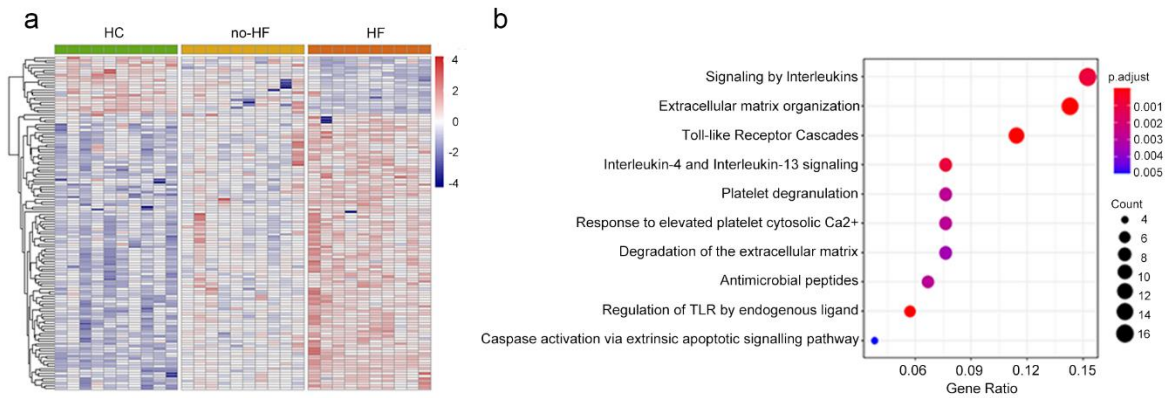

7  
8

1 **Supplementary Fig. 4 least absolute shrinkage and selection operator (LASSO) analysis**  
2 **to select the optimum candidate proteins**

3 **a** Plots of the LASSO regression coefficients for different penalty parameter values. **b** Cross-validation plot  
4 of penalty terms. **c** Estimated coefficients for the LASSO regression of candidate proteins.

5

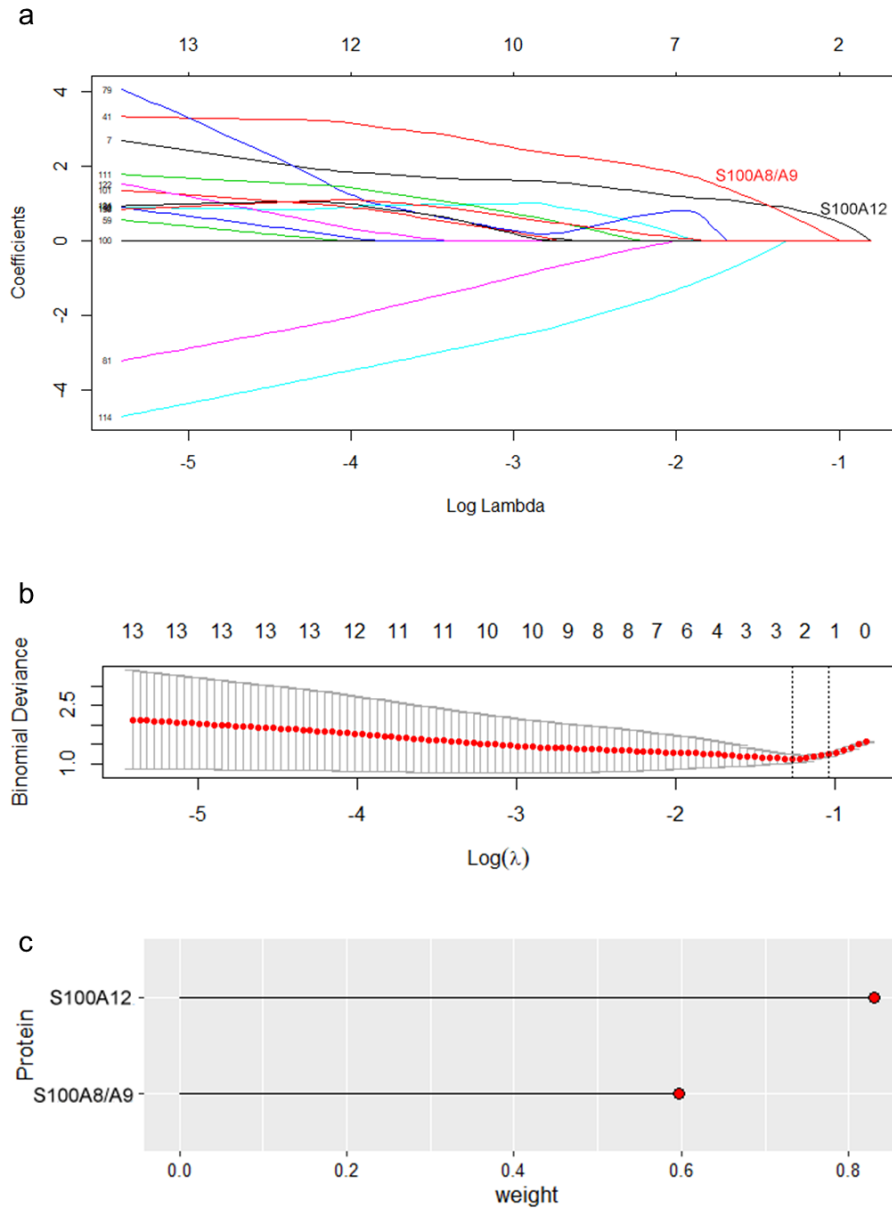

6

7

8



**Supplementary Fig. 5 Predictive values of S100A12 in the discovery cohort**

**a** S100A12 levels were measured upon admission to the discovery cohort. Red: Patients who experienced HF events; blue: Patients who did not experience HF events. The scatter plots in this figure show the median (center line), 25th, and 75th percentile (lower and upper boundary). Differences between the two groups were analyzed using a two-sided Wilcoxon-test.  $P < 0.05$  was considered as significant. **b** Unadjusted and adjusted HRs from Cox proportional hazards regression analysis for S100A12 levels at admission in the discovery cohort ( $n=1062$ ), which are indicated with the points and the bars showing the 95% confidence interval. Model 1: adjusted for age and sex; Model 2: adjusted for model 1+systolic blood pressure, Killip classification at admission, fasting glucose, creatinine, and left main artery disease; Model 3: adjusted for model 2+neutrophil count, cardiac troponin I, B-type natriuretic peptide, C-reactive protein, left ventricular ejection fraction at admission, and estimated infarct size (CK-MB  $AUC_{0-72}$ ). P values reported are two-tailed from COX proportional hazard regression analyses.  $P < 0.05$  was considered as significant. HF, heart failure; HRs, hazard ratios.

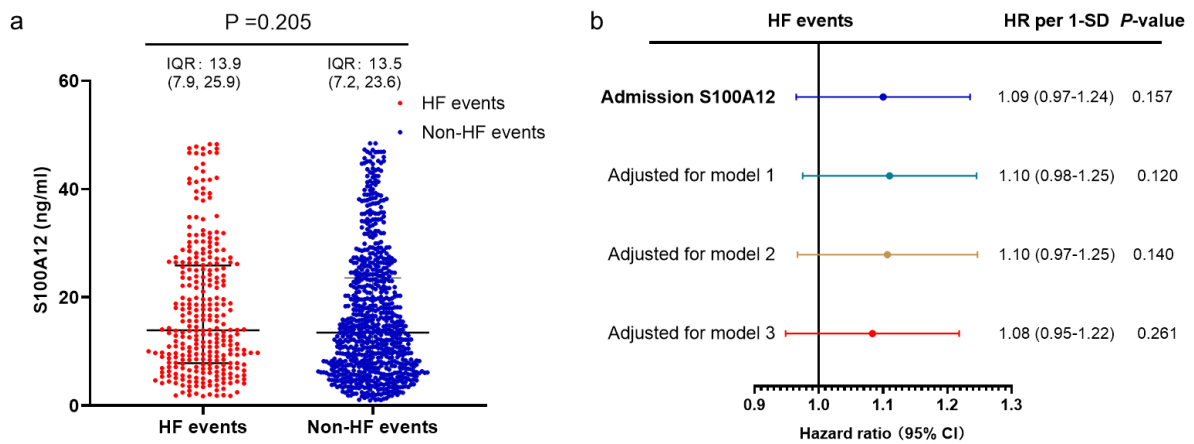

15  
16  
17  
18  
19

1 **Supplementary Fig. 6 Multiple-adjusted hazard ratios of HF events associated with HF-**  
2 **related proteins**

3 Possible nonlinear relationships between HF-related proteins and HF events were examined with restricted  
4 cubic splines in discovery cohort (n=1062). Hazard ratios of S100A8/A9 (a) and S100A12 (b) were adjusted  
5 for age, sex, systolic blood pressure, Killip classification at admission, fasting glucose, creatinine, left main  
6 artery disease, neutrophil count, cardiac troponin I, B-type natriuretic peptide, C-reactive protein, left  
7 ventricular ejection fraction at admission, and estimated infarct size (CK-MB AUC0-72).

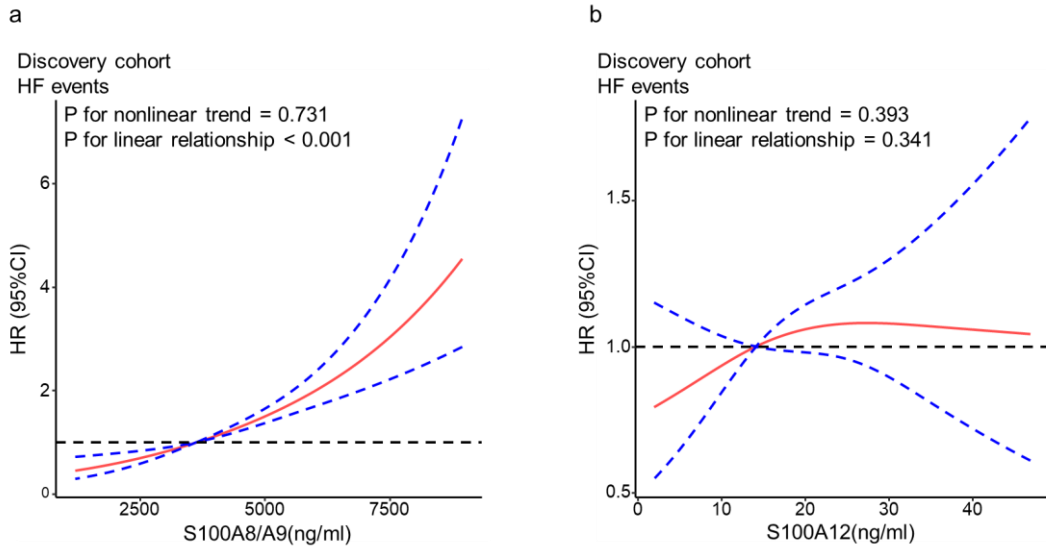

8  
9  
10  
11  
12  
13  
14  
15  
16  
17  
18

1 **Supplementary Fig. 7 Subgroup analysis of S100A8/A9 and S100A12 prognostic values**

2 The adjusted variables for S100A8/A9 (a) and S100A12 (b) included age, sex, systolic blood pressure, Killip  
 3 classification at admission, fasting; creatinine, left main artery disease, neutrophil count, cardiac troponin I,  
 4 B-type natriuretic peptide, C-reactive protein levels, left ventricular ejection fraction at admission, and  
 5 estimated infarct size (CK-MB AUC<sub>0-72</sub>). Boxes represent HR. Error bars represent 95% CI. P values  
 6 reported are two-tailed from COX proportional hazard regression analyses. HR, hazard ratio.

7

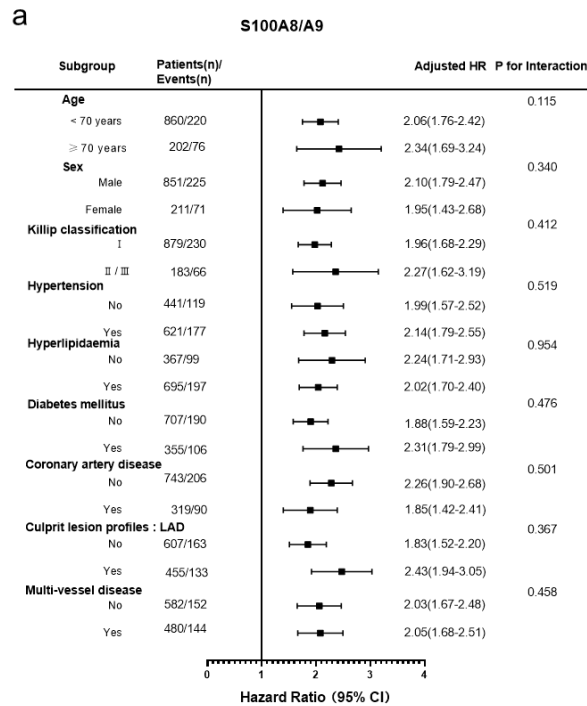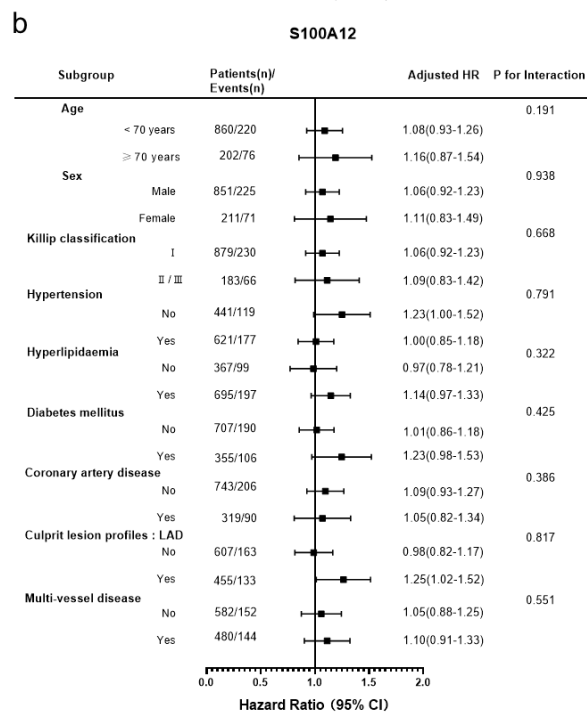

8

1 **Supplementary Fig. 8 Decision curve analysis of combined S100A8/A9 and reference**  
2 **model vs. reference model alone for the HF events**

3 The reference models included age, sex, systolic blood pressure (SBP), Killip classification at admission,  
4 fasting glucose, creatinine, left main artery disease, neutrophil count, cardiac troponin I, B-type natriuretic  
5 peptide, C-reactive protein levels, left ventricular ejection fraction at admission, and estimated infarct size  
6 (CK-MB AUC<sub>0-72</sub>) in the discovery (a) and validation cohorts (b).

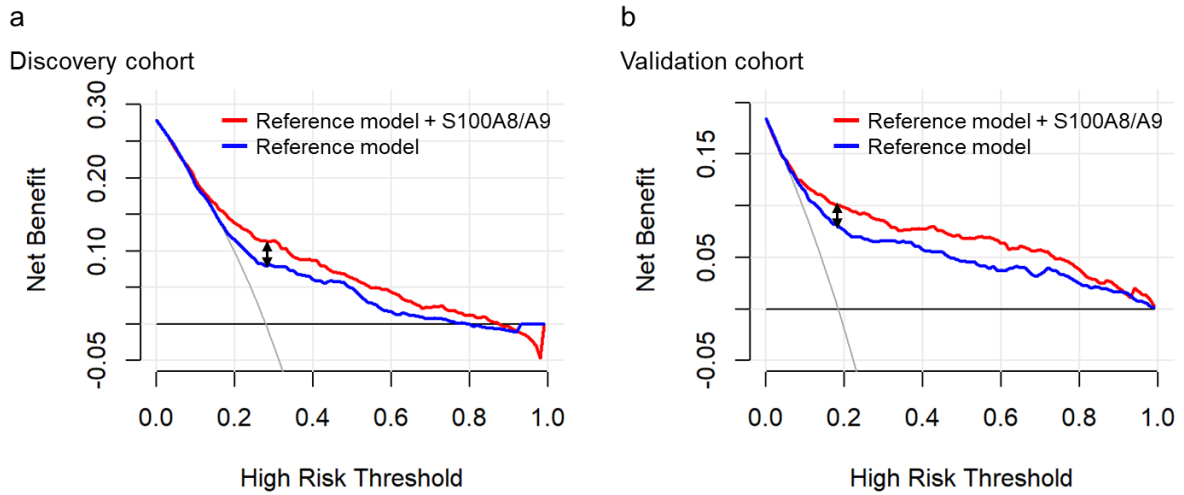

7  
8  
9  
10  
11  
12

1 **Supplementary Fig. 9 S100A8/A9 plasma concentrations in each Killip class on admission**  
2 **in combined cohorts**

3 S100A8/A9 levels were show in combined cohorts according to Killip class I, II and III. Green: Patients with  
4 Killip class I; blue: Patients with Killip class II; Red: Patients with Killip class III. The scatter plots show  
5 the median (center line), 25th, and 75th percentile (lower and upper boundary). Differences between the two  
6 groups were analyzed using a two-sided Wilcoxon-test.  $P < 0.05$  was considered as significant.  
7

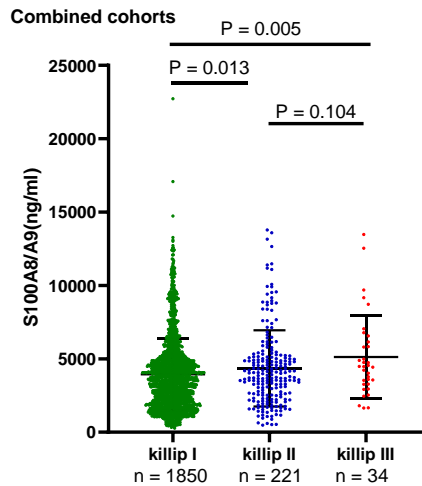

8  
9

10

11

12

1 **Supplementary Fig. 10 Correlation between serum S100A8/A9 levels and S100A9 levels**  
 2 **a** Scatter plot of the correlation between S100A8/A9 levels and S100A9. P values reported are two-tailed  
 3 from pearson correlation.  $P < 0.05$  was considered as significant. **b-c** Distribution of S100A9 (**b**) and  
 4 S100A8/A9 (**c**) in HC (n = 24), patients with AMI without HF (n=24), and patients with AMI with HF (n =  
 5 24). Differences between the two groups were analyzed using a two-sided Wilcoxon-test.  $P < 0.05$  was  
 6 considered as significant.

7

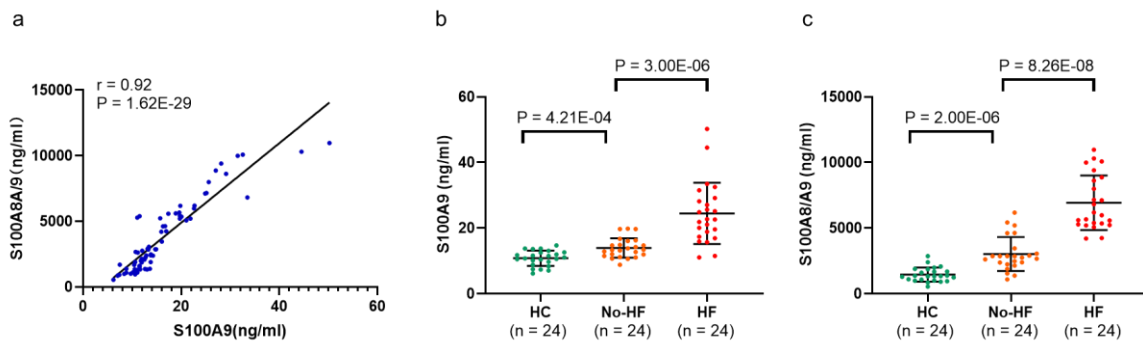

8

9

1 **Supplementary Fig. 11 S100A8/A9 genetic score construction**

2 **a** Mendelian randomization (MR) study design. **b** Twenty cis-pQTLs selecting within 20 kb of either side of  
 3 S100A9 and their linkage disequilibrium relationship calculated by Haploview software using CHB data  
 4 as reference. The number in each cell is  $R^2$  of its corresponding two SNPs, which is a parameter indicating  
 5 the degree of linkage disequilibrium between two SNPs. The larger  $R^2$ , the stronger the degree of linkage  
 6 disequilibrium. The red cells without number mean the  $R^2 = 1$ .

7

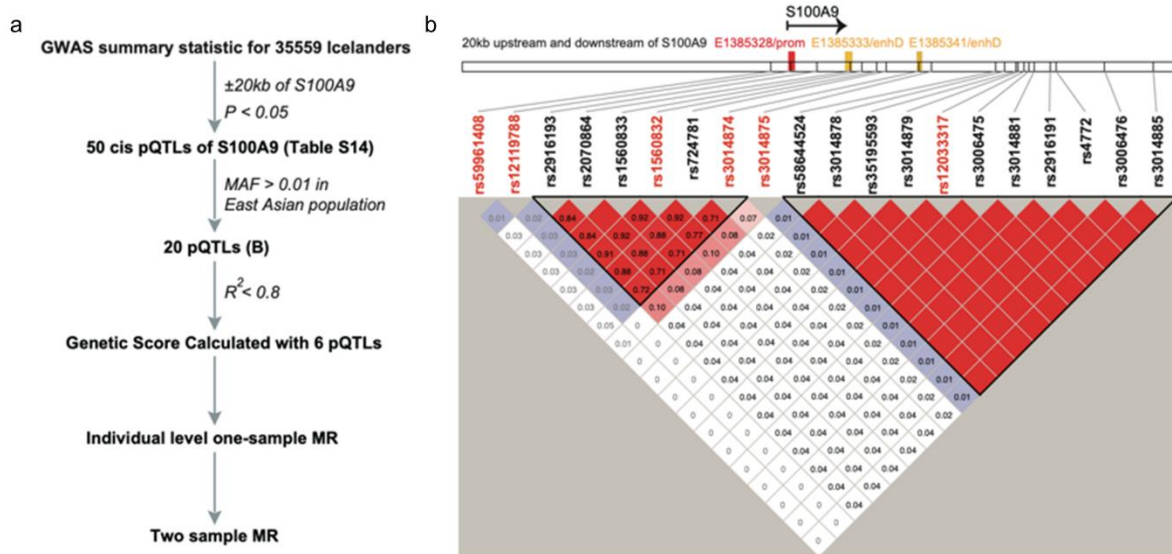

8

9

10

11

1 **Supplementary Fig. 12 Association between S100A8/A9 genetic score and S100A8/A9**  
2 **plasma concentrations in the validation cohort.**

3 **a** Distribution of S100A8/A9 plasma concentrations in different S100A8/A9 genetic score groups.  
4 Differences between the two groups were analyzed using a two-sided Wilcoxon-test.  $P < 0.05$  was  
5 considered as significant. **b** Scatter plot correlation of S100A8/A9 plasma concentrations and S100A8/A9  
6 genetic score. P values reported are two-tailed from pearson correlation.  $P < 0.05$  was considered as  
7 significant.

8

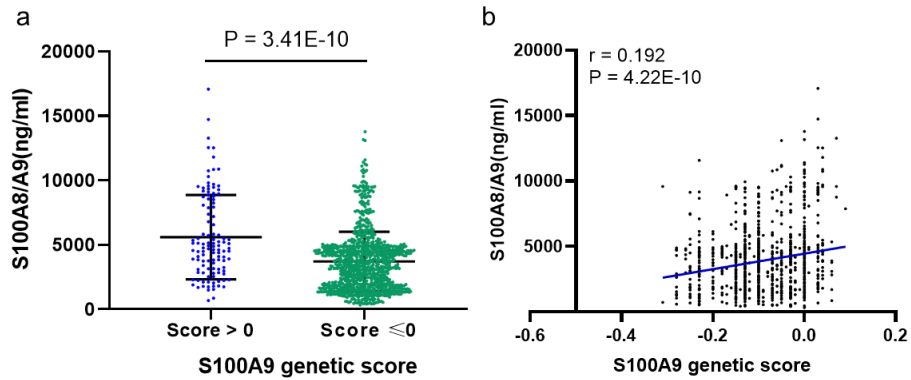

9

10

11



1 **Supplementary Fig. 13 Diagram of two-sample MR framework in the present study**

2 AMI, acute myocardial infarction; HF, heart failure; IVW, inverse variance-weighted; MR, Mendelian  
3 randomization; pQTL, protein quantitative trait loci; SNPs, single nucleotide polymorphisms; UKB, UK  
4 Biobank.

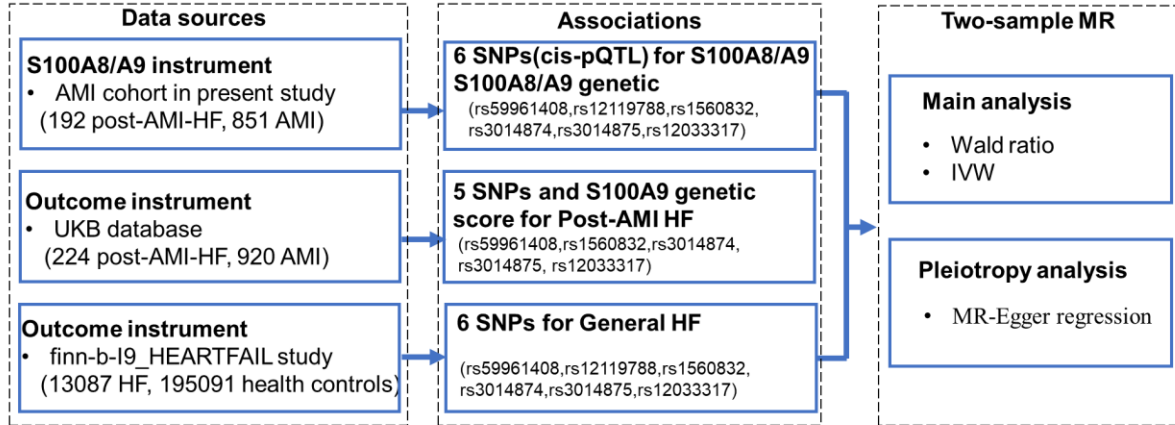

5  
6

1 **Supplementary Fig. 14 Dose-response curves showing the causal effect of S100A8/A9**  
2 **levels on post- myocardial infarction /general HF**

3 The strength of the association between HF events and each S100A9 SNPs on the y-axis against the  
4 association between S100A8/A9 levels and each SNP on the x-axis in validation cohort (192 HF events, 851  
5 No-HF events) (a), UK Biobank (224 HF events, 920 No-HF events) (b) and, finn-b-I9\_HEARTFAIL study  
6 (13,087 patients with HF, 19,5091 controls) (c). The slopes of line represent the causal effect of inverse-  
7 variance weighted.  
8

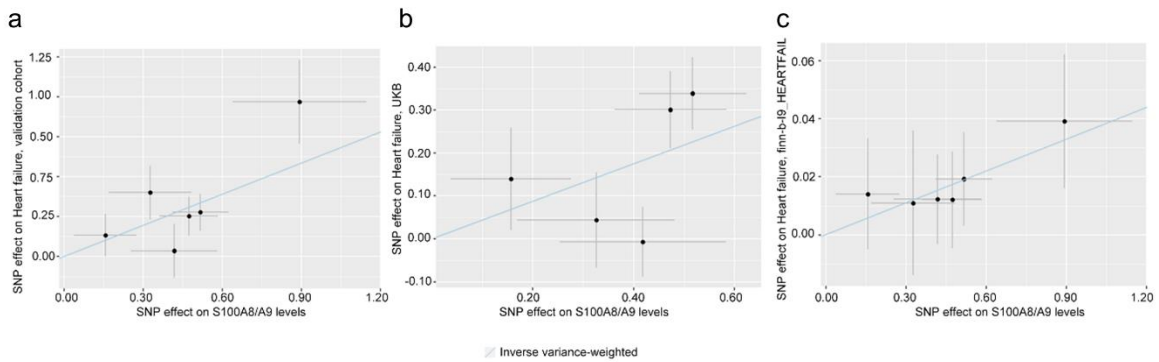

9  
10

1 **Supplementary Fig. 15 LocusZoom plots of the pQTLs and GWAS signals within 20 kb**  
2 **of either side of S100A9.**

3 **a** LocusZoom plot indicating pQTL of S100A9 in serum. **b** LocusZoom plot indication GWAS signals for  
4 post-AMI HF in UKB cohort. **c** LocusZoom plot indication GWAS signals for general HF in finn-b-19  
5 HEARTFAIL.

6

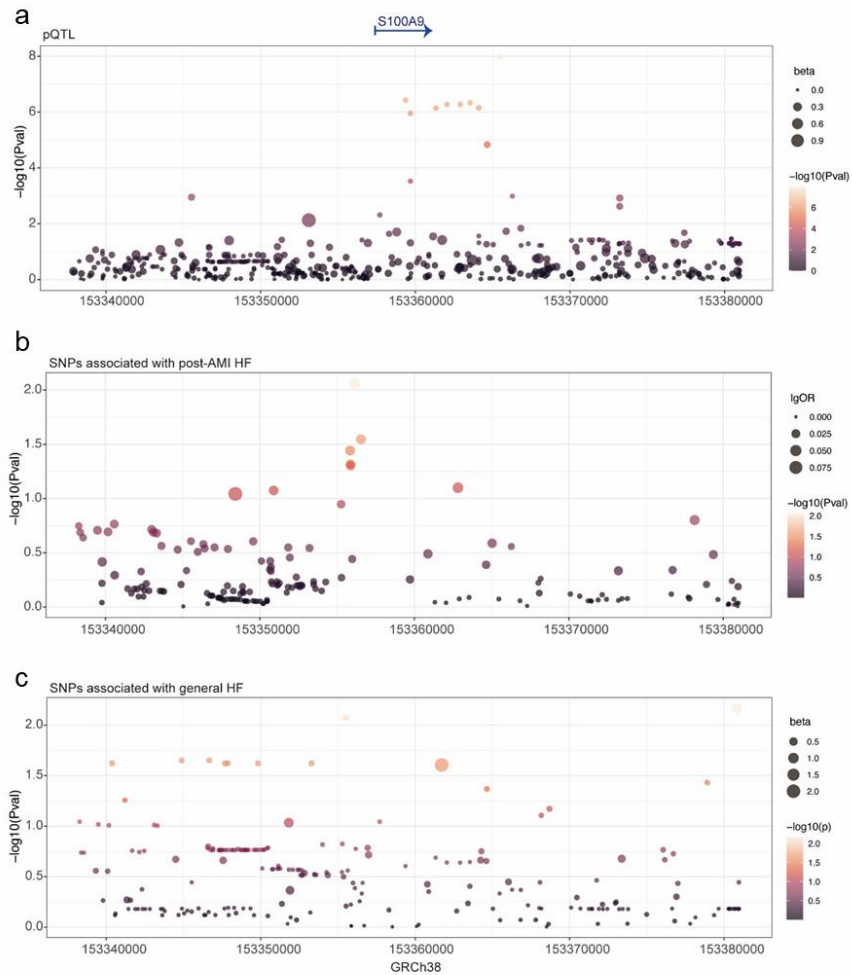

7

8

- 1 **Supplementary Fig. 16 Estimation of infarct size in discovery and validation cohorts.**
- 2 Measurement of infarct size by 72-h creatine kinase-MB isoenzyme (a, b) release. CK-MB, Creatine
- 3 kinase-MB isoenzyme.

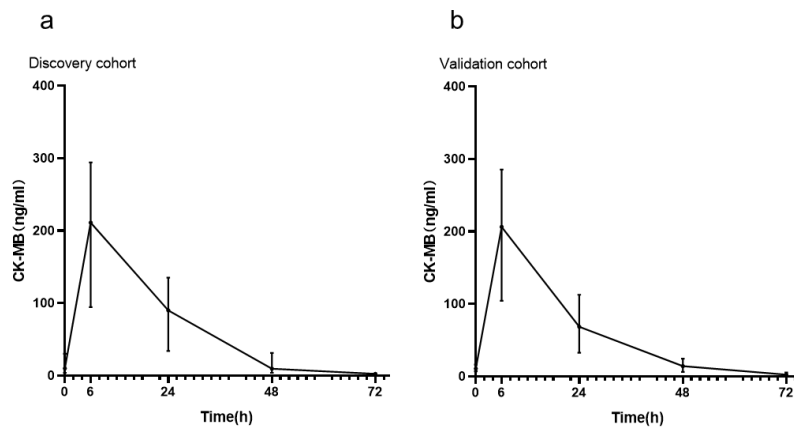

- 4
- 5
