# Supplementary material for: S100A8/A9 as a prognostic biomarker with causal effects for post-acute myocardial infarction heart failure
Source: PubMed Central journal article supplement (PMC10973499; doi:10.1038/s41467-024-46973-7), 2024-03-27
Supplement: 41467_2024_46973_MOESM3_ESM.pdf [file 41467_2024_46973_MOESM3_ESM.pdf]

## **Description of Additional Supplementary File**

File Name: Supplementary Data 1

Description: The human antibody array containing 1000 proteins from HCs and patients with AMI with or without HF events at admission (n = 10 per group) in the step 1.
